# Supplementary material for: Ion specific effects on the immobilisation of charged gold nanoparticles on metal surfaces
Source: Royal Society of Chemistry journal article supplement (doi:10.1039/c7ra10374c), 2018-01-01
Supplement: c7ra10374c1.pdf [file c7ra10374c1.pdf]

Electronic Supplementary Information

for

# Ion Specific Effects on the Immobilisation of Charged Gold Nanoparticles on Metal Surfaces

C. Kaulen and U. Simon

*1. JARA – FIT, RWTH Aachen University, 52074 Aachen, Germany and 2. Institute of Inorganic Chemistry, RWTH Aachen University, 52074 Aachen, Germany*

# 1. Characterisation of Au-MOA

## a. UV-Vis

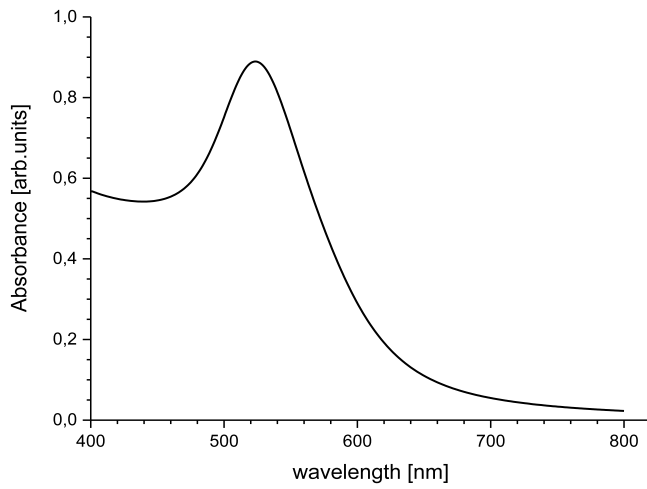

Figure S1: UV-vis absorbance spectrum of Au-MOA in ultrapure water

## b. DLS

Z.Average:  $25.90 \pm 0.03$  nm

PDI: 0.26

Zeta-potential:  $-42.5 \pm 9.8$  mV in HEPES/TRIS buffer at pH 9

SEM-T

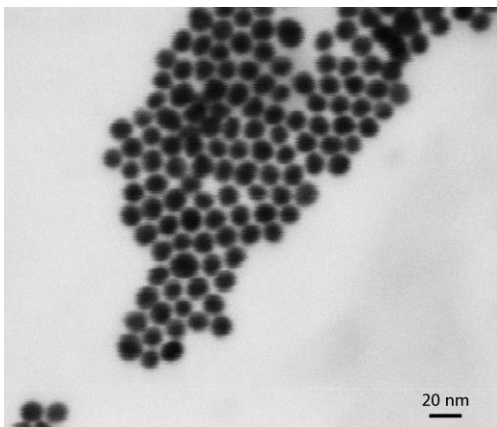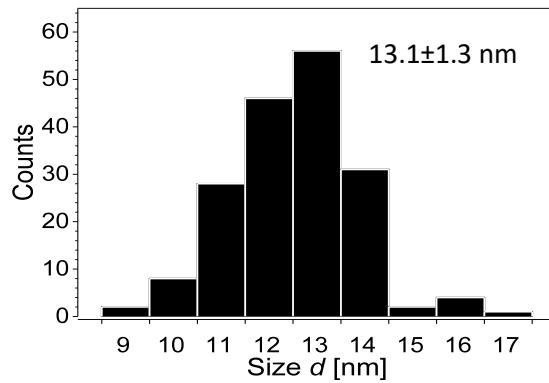

Mean diameter of Au-MOA:  $13.1 \pm 1.3$  nm

Figure S2: Representative SEM-T picture of Au-MOA and corresponding size distribution histogram

## 2. Characterisation of Au-AOT:

### a. UV-Vis

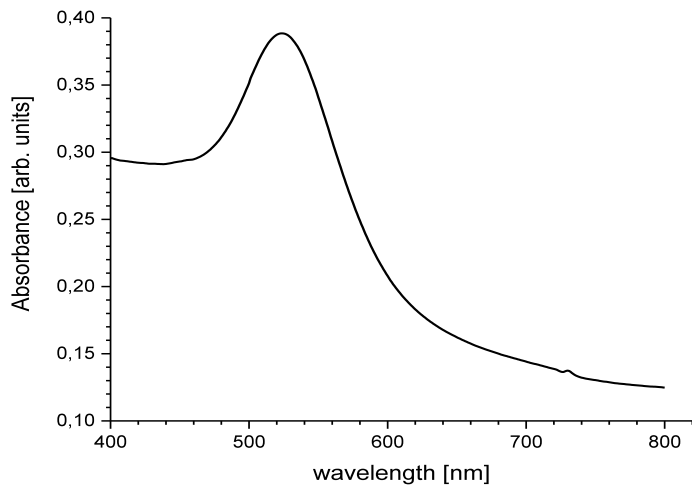

Figure S3: UV-vis absorbance spectrum of Au-AOT in ultrapure water

### b. DLS

Z.Average:  $38.04 \pm 0.50$  PDI:  $0.62 \pm 0.13$

Zeta-potential:  $+60.7 \pm 8.5$  mV in diluted HCl at pH 3

### c. SEM-T

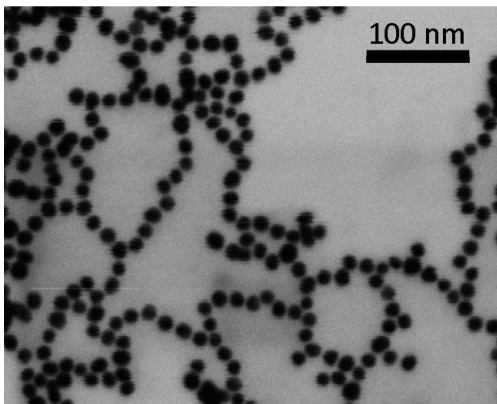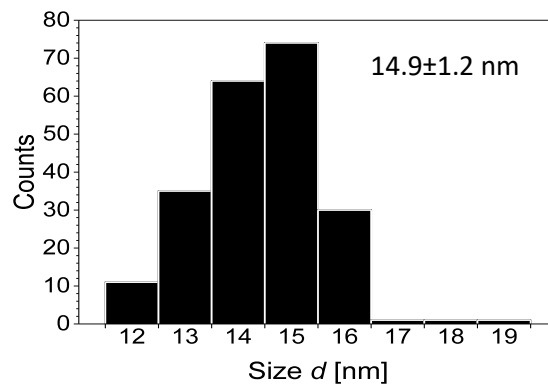

Mean diameter Au-AOT:  $14.9 \pm 1.2$  nm

Figure S4: Representative SEM-T picture of Au-AOT and corresponding size distribution histogram

3. Additional SEM images of the adsorption of Au-MOA on Pt/AuPd-substrates:

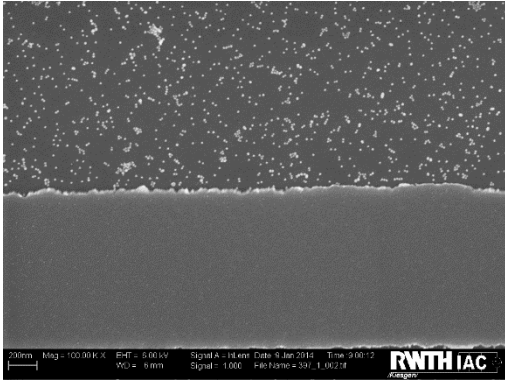

LiCl

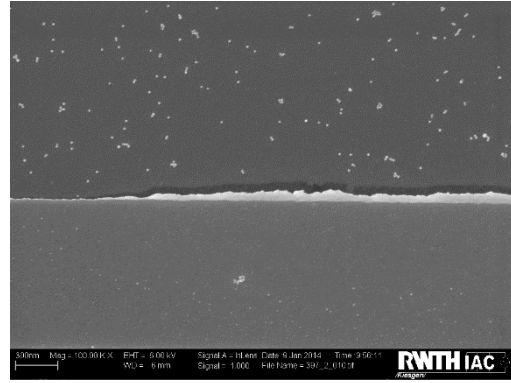

NaCl

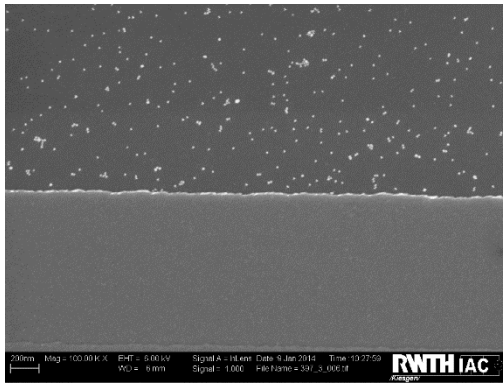

KCl

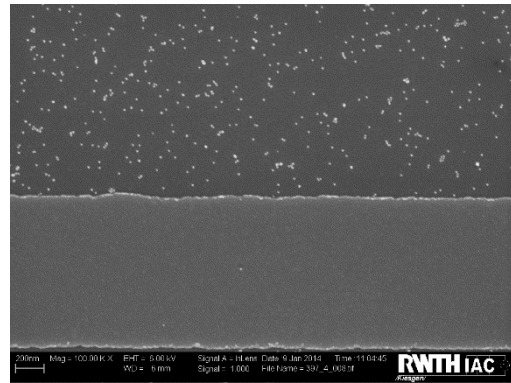

CsCl

Figure S5: Additional SEM images of adsorption experiments of Au-MOA with added monovalent salts MCl (M = Li, Na, K, Cs)

4. Additional SEM images of the adsorption of Au-AOT on Pt/AuPd-substrates:

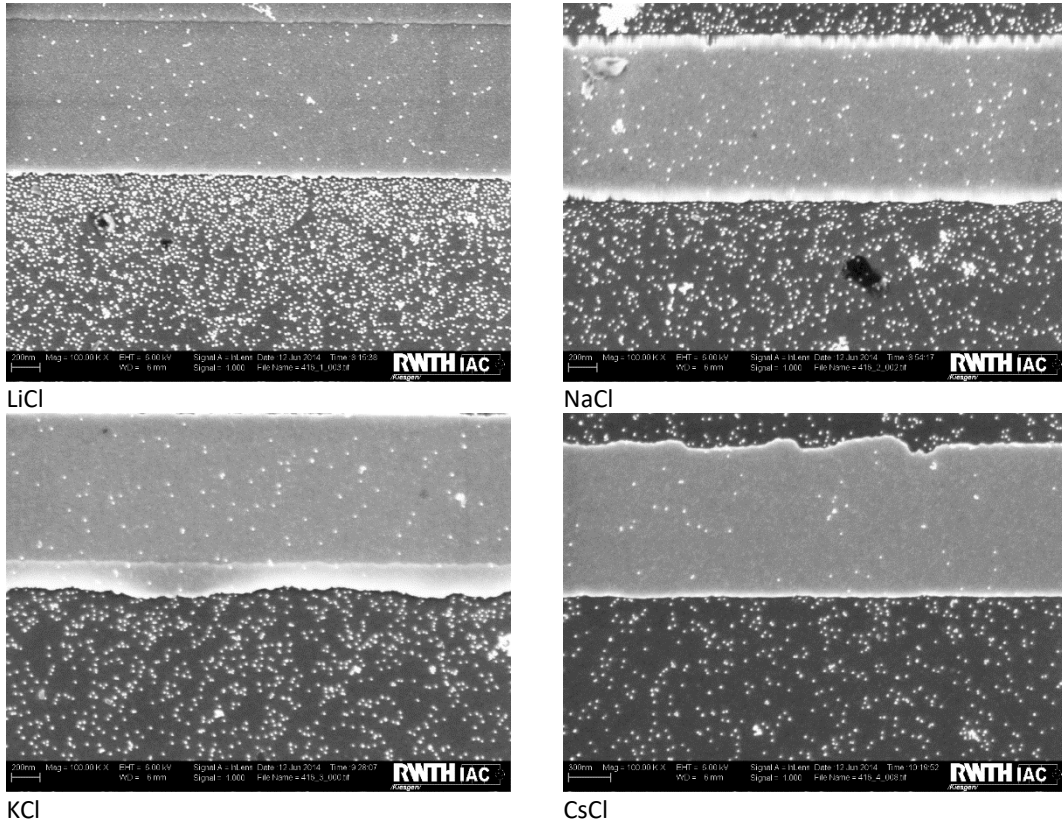

Figure S6: Additional SEM images of adsorption experiments of Au-AOT with added monovalent salts MCl (M = Li, Na, K, Cs)

5. SEM images of the formed aggregates

| time | Au-MOA                                                                              | Au-AOT                                                                               |
|------|-------------------------------------------------------------------------------------|--------------------------------------------------------------------------------------|
| 0    | 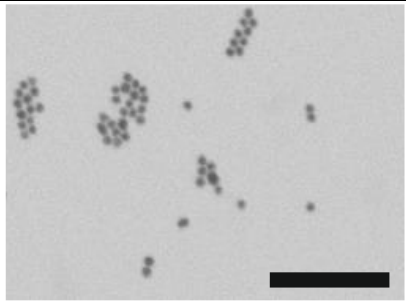   |    |
| 5    |    |    |
| 10   |   |   |
| 15   |  |  |
| 20   |  |  |

25

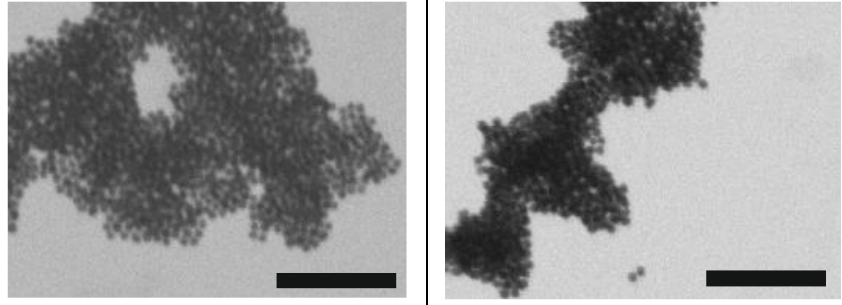

10 $\mu$ l samples of Au-MOA in 45 mmol NaCl and of Au-AOT in 125 mmol NaCl were taken every five minutes after mixing and deposited on the carbon surface of a TEM grid. After five additional minutes the solution was removed with a KIM wipe and the grids were allowed to dry at 20% air humidity and 20°C. SEM images were acquired with a high resolution Field Emission Scanning Electron Microscope in transmission mode (FE-SEM, LEO/ZEISS Supra 35 VP, Oberkochen, Germany). Scale bar represents 200 nm.

#### 6. Salt Induced Aggregation of Au-MOA with LiCl

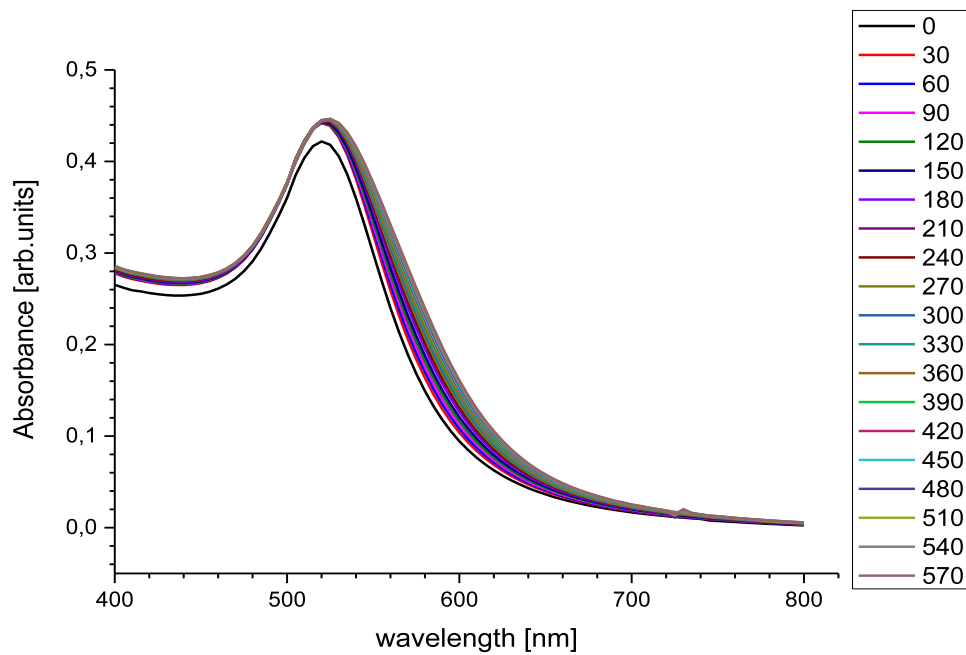

Figure S7: Time dependent absorption spectra of Au-MOA in HEPES/TRIS at pH 9 and 50 mMol LiCl

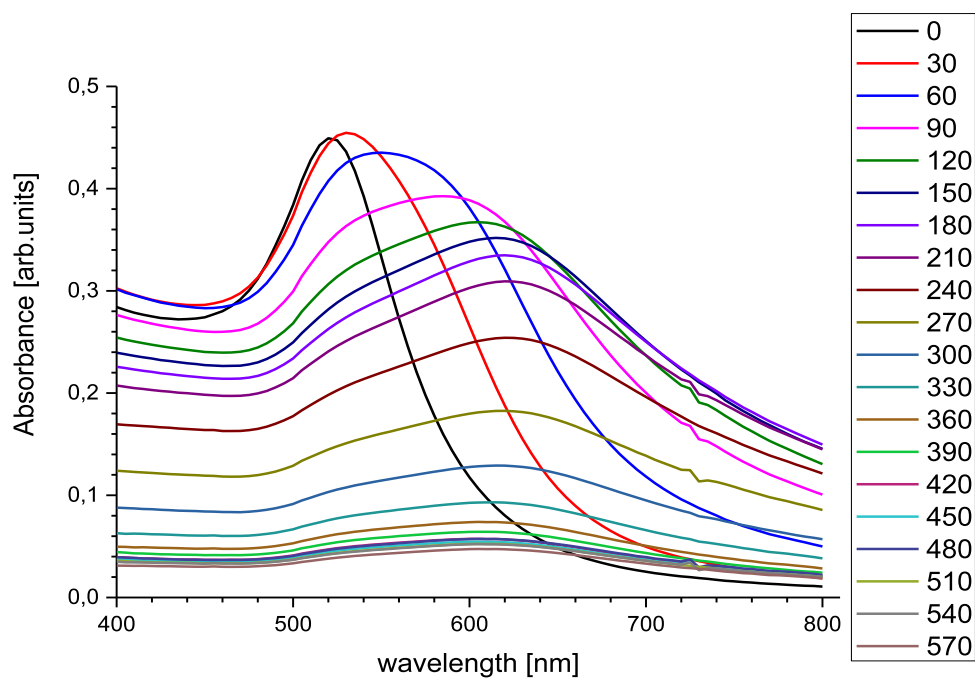

Figure S8: Time dependent absorption spectra of Au-MOA in HEPES/TRIS at pH 9 and 60 mMol LiCl

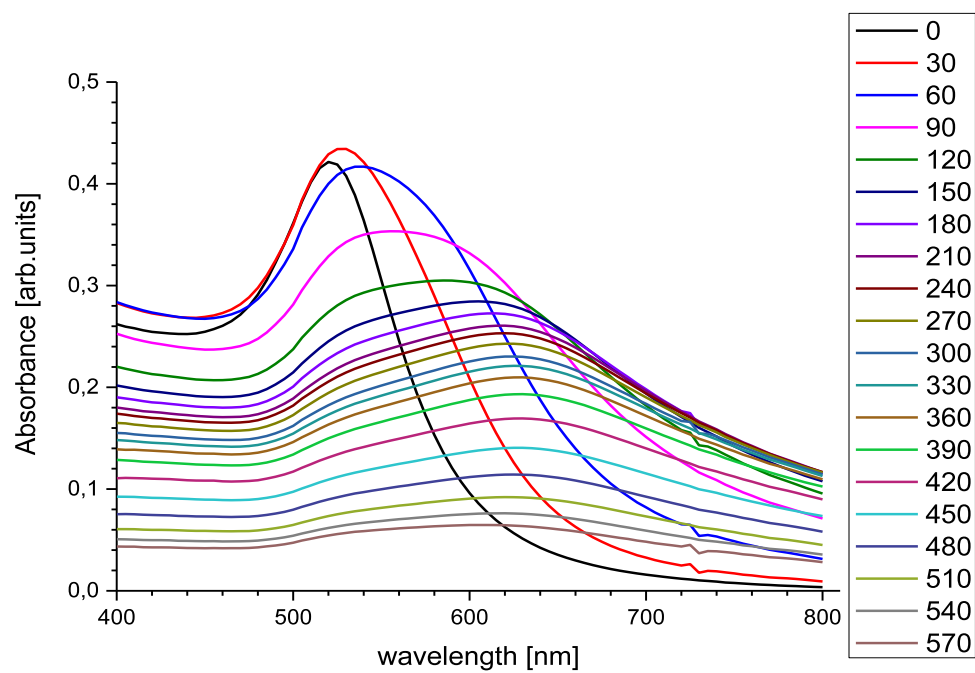

Figure S9: Time dependent absorption spectra of Au-MOA in HEPES/TRIS at pH 9 and 70 mMol LiCl



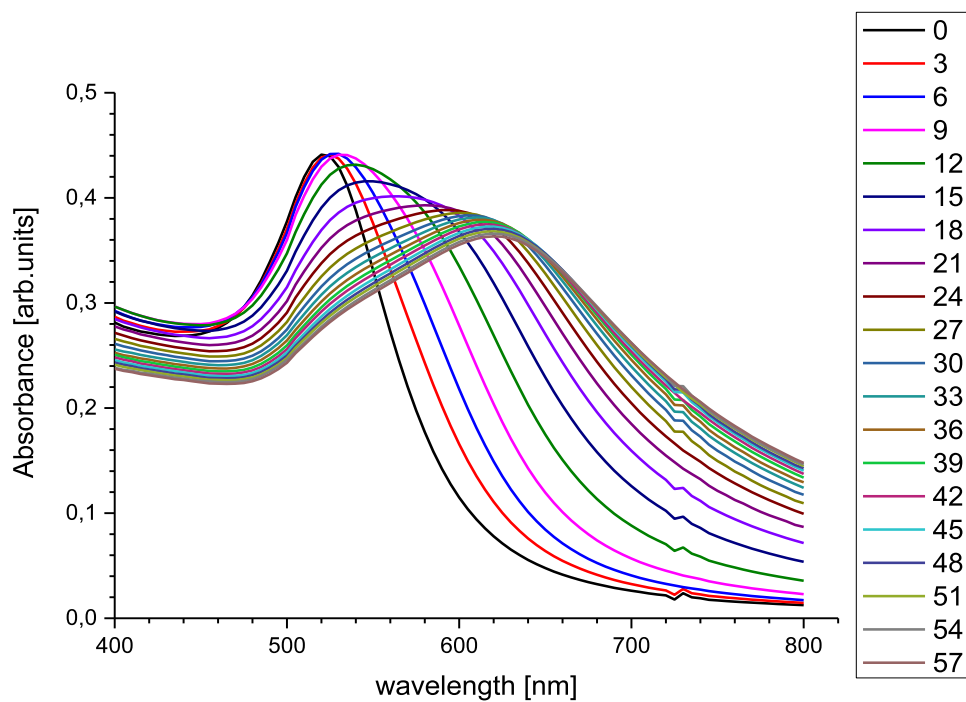

Figure S10: Time dependent absorption spectra of Au-MOA in HEPES/TRIS at pH 9 and 80 mMol LiCl

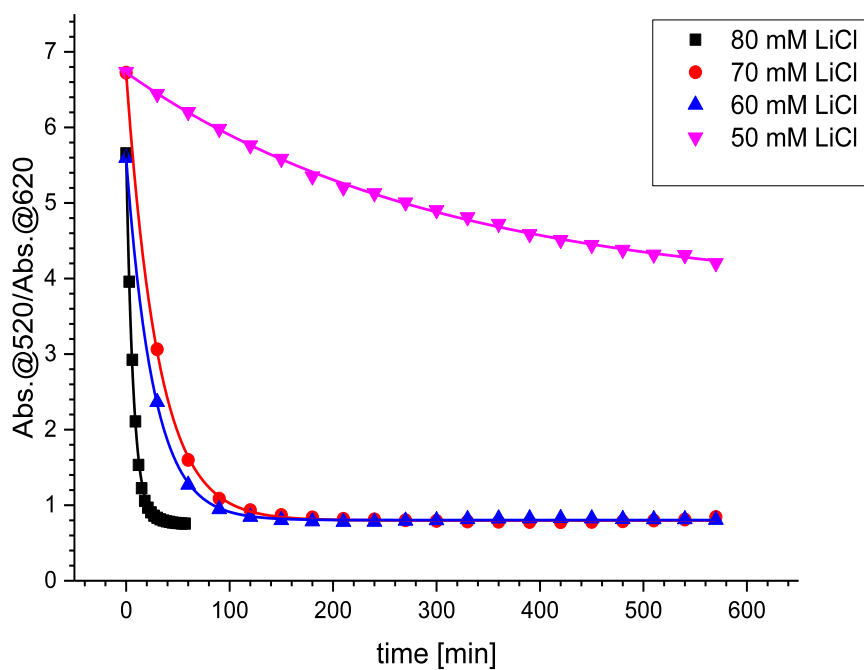

Figure S11: Progression of the ratio of absorbance  $R$  (symbols) for LiCl concentrations from 50 mM to 80 mM and the respective fit curves (lines) fitted by a first order exponential decay function.

## 7. Salt Induced Aggregation of Au-MOA with NaC

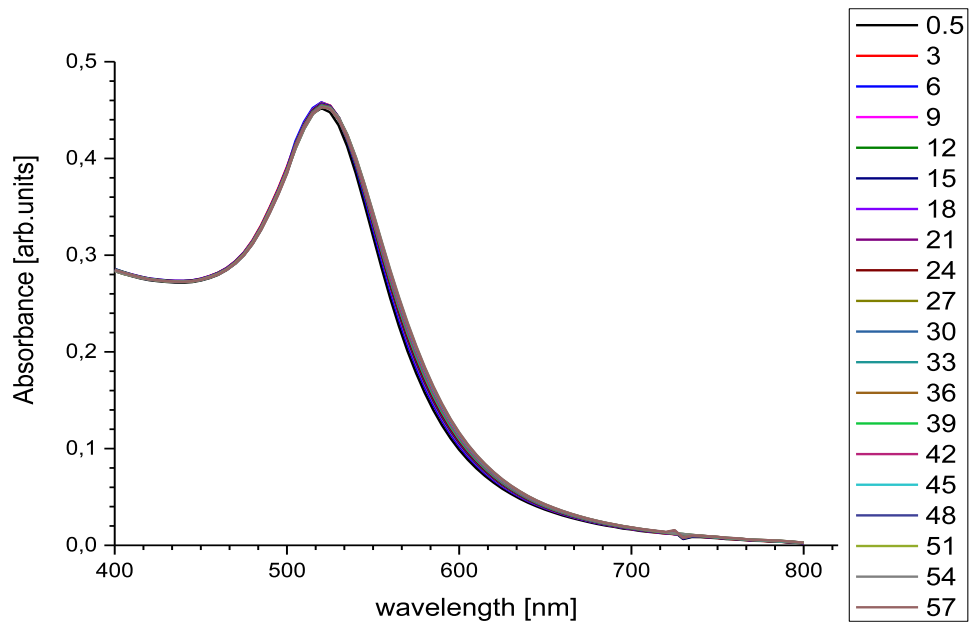

Figure S12: Time dependent absorption spectra of Au-MOA in HEPES/TRIS at pH 9 and 40 mMol NaCl

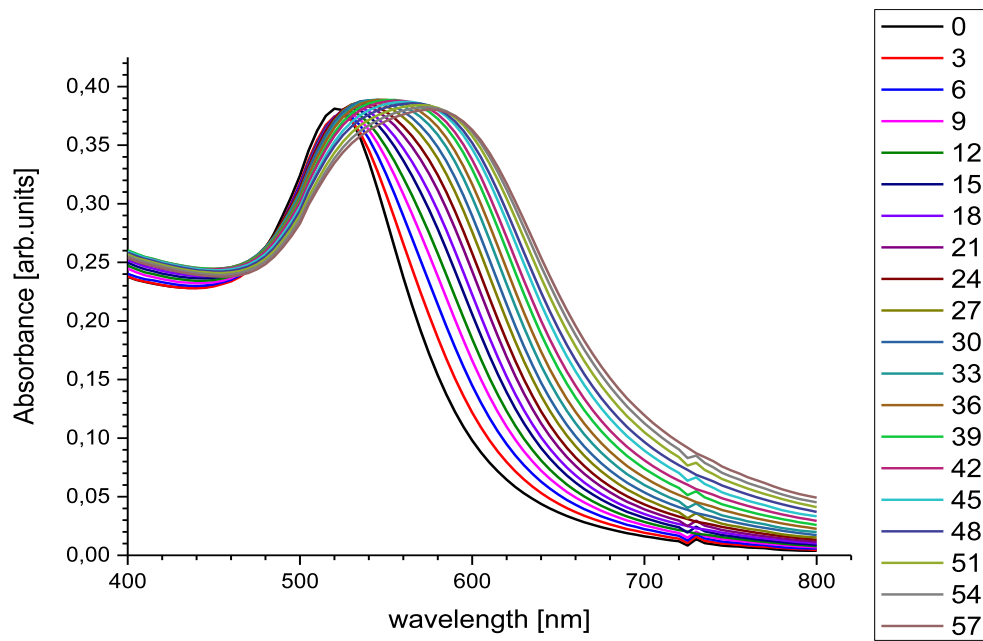

Figure S13: Time dependent absorption spectra of Au-MOA in HEPES/TRIS at pH 9 and 45 mMol NaCl

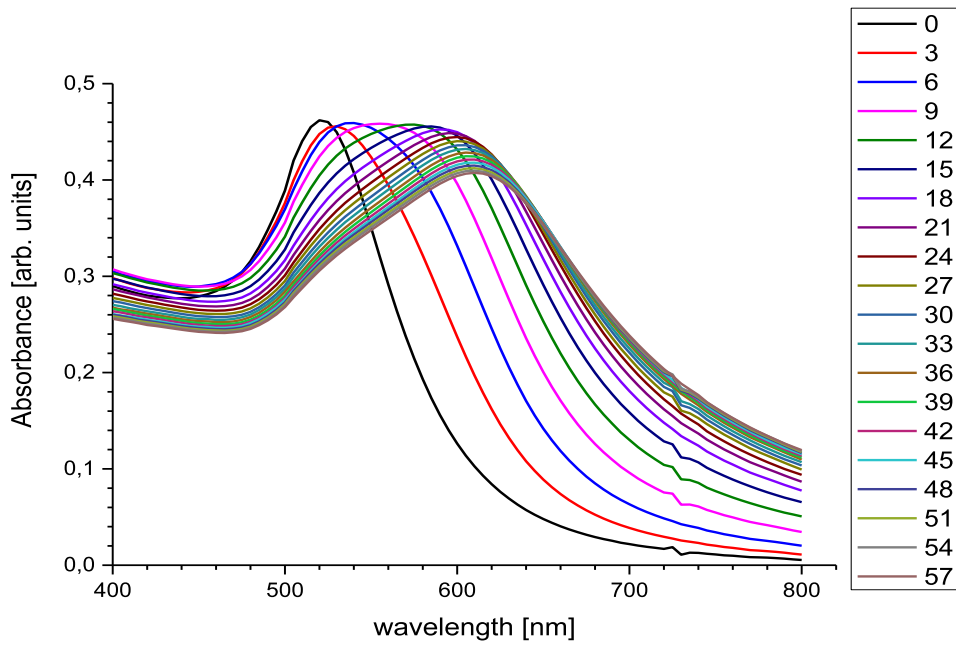

Figure S14: Time dependent absorption spectra of Au-MOA in HEPES/TRIS at pH 9 and 50 mMol NaCl

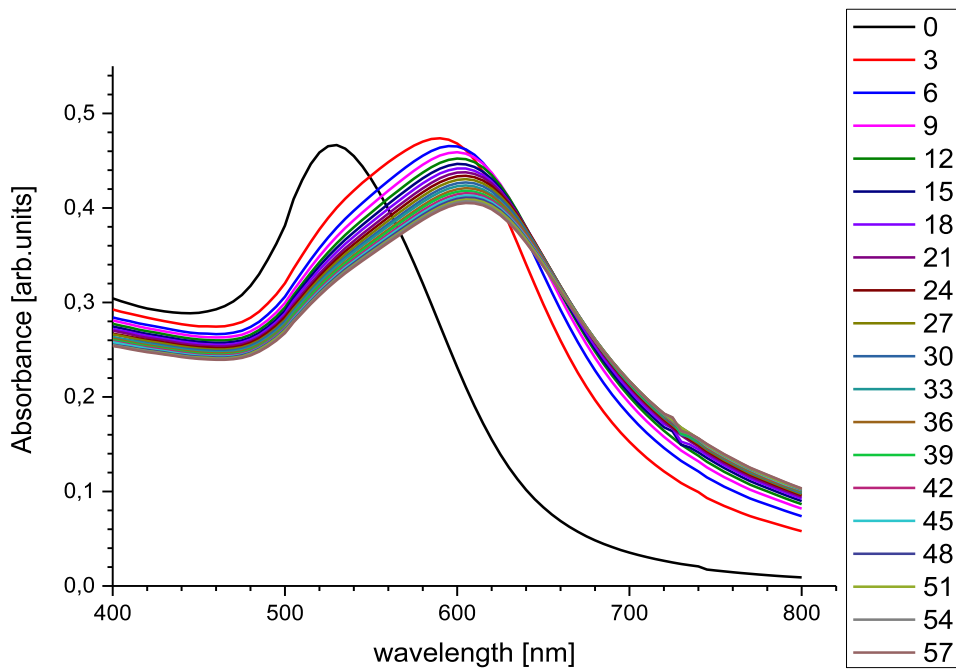

Figure S15: Time dependent absorption spectra of Au-MOA in HEPES/TRIS at pH 9 and 60 mMol NaCl

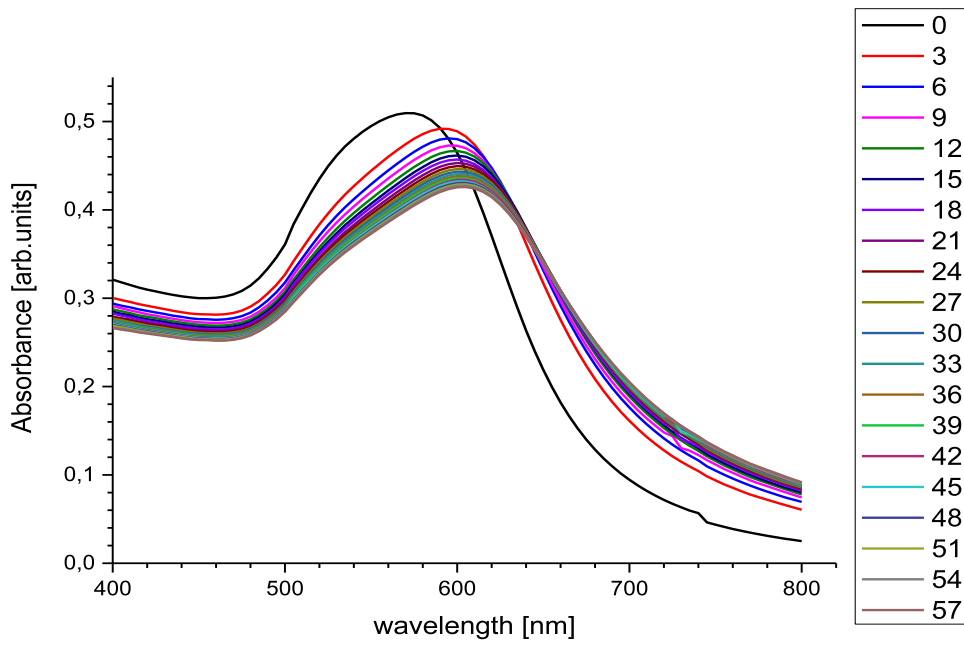

Figure S16: Time dependent absorption spectra of Au-MOA in HEPES/TRIS at pH 9 and 70 mMol NaCl

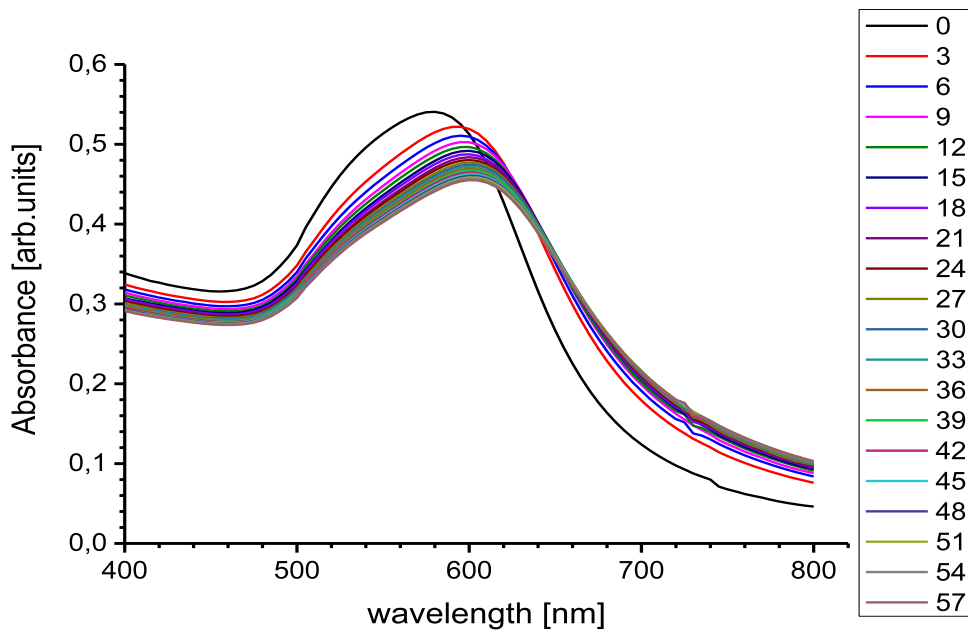

Figure S17: Time dependent absorption spectra of Au-MOA in HEPES/TRIS at pH 9 and 80 mMol NaCl

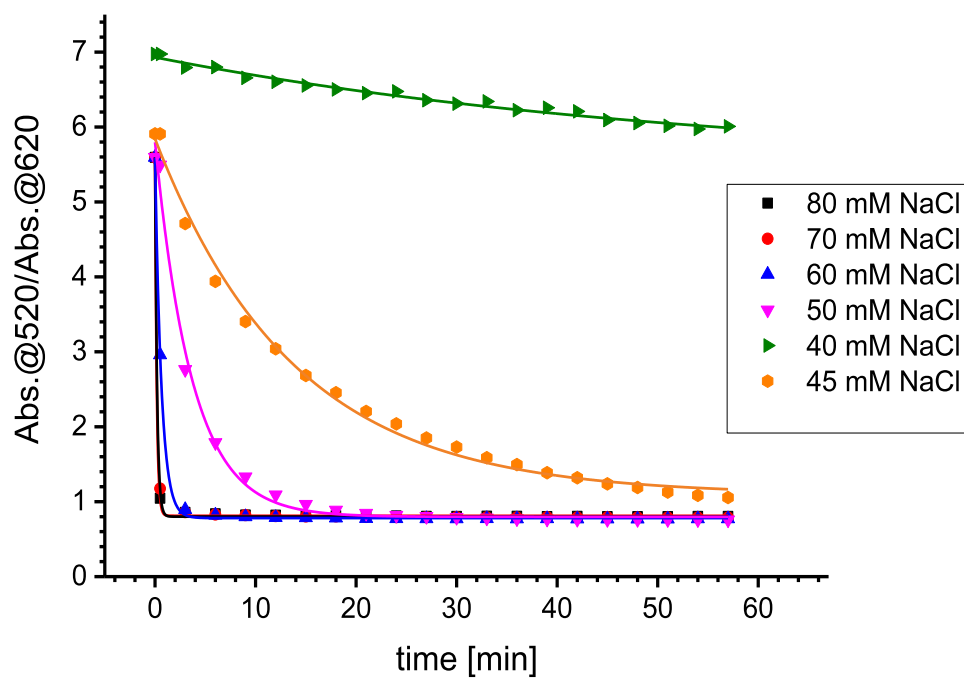

Figure S18: Progression of the ratio of absorbance  $R$  (symbols) for NaCl concentrations from 40 mM to 80 mM and the respective fit curves (lines) fitted by a first order exponential decay function.

## 8. Salt Induced Aggregation of Au-MOA with KCl

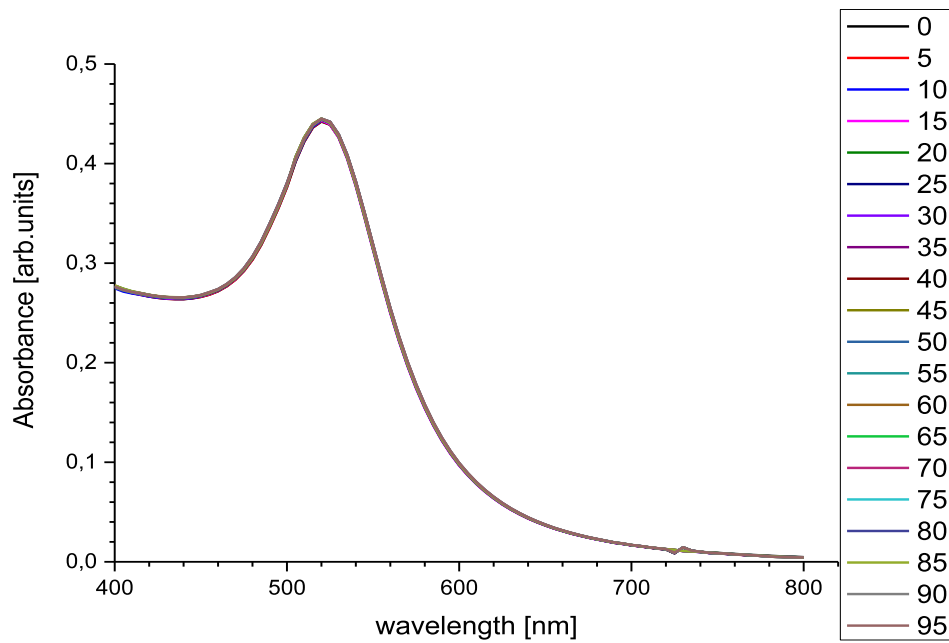

Figure S19: Time dependent absorption spectra of Au-MOA in HEPES/TRIS at pH 9 and 30 mMol KCl

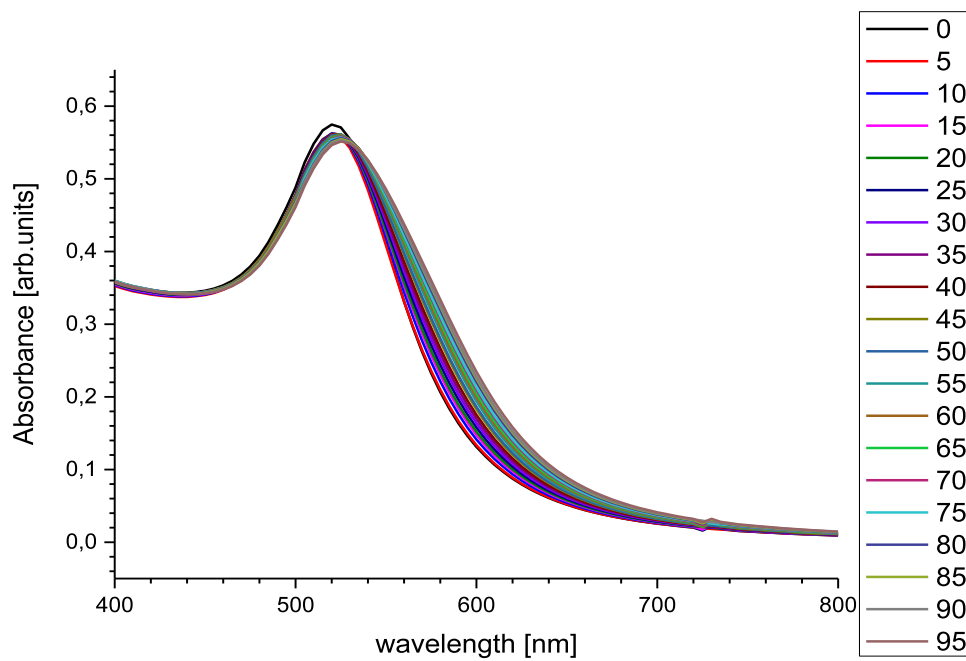

Figure S20: Time dependent absorption spectra of Au-MOA in HEPES/TRIS at pH 9 and 40 mMol KCl

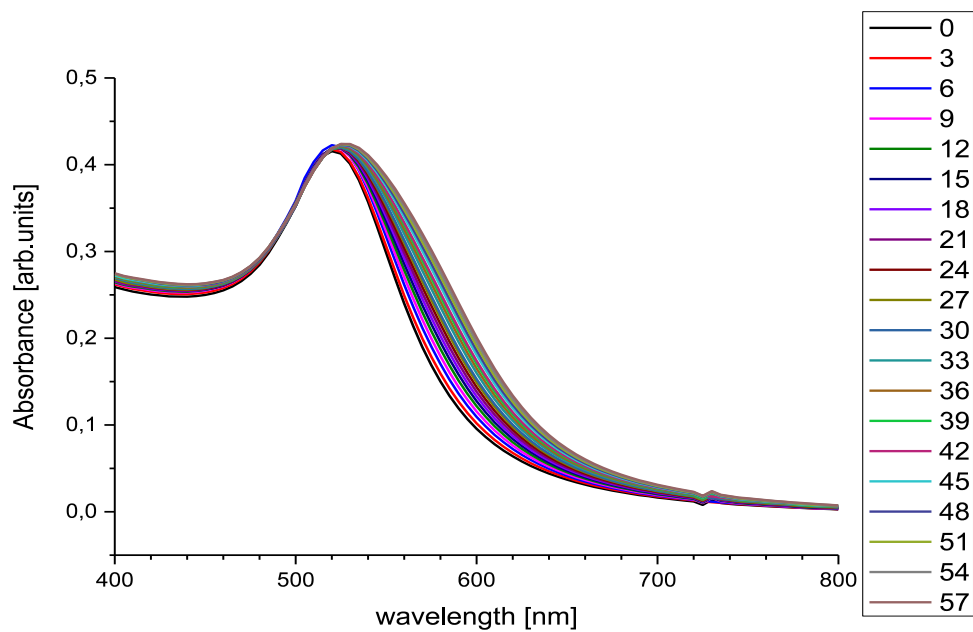

Figure S21: Time dependent absorption spectra of Au-MOA in HEPES/TRIS at pH 9 and 45 mMol KCl

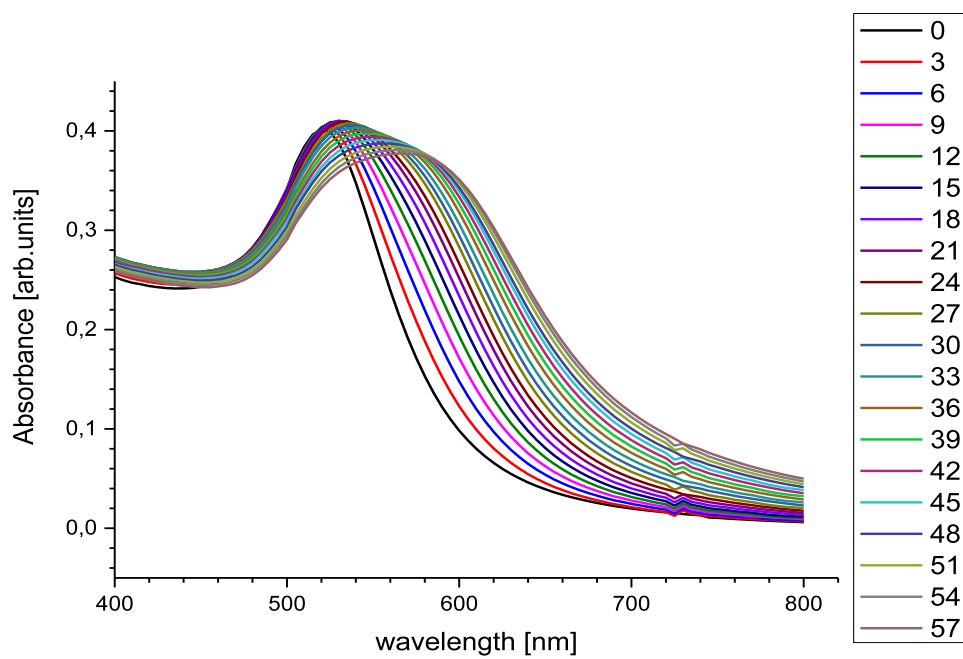

Figure S22: Time dependent absorption spectra of Au-MOA in HEPES/TRIS at pH 9 and 50 mMol KCl

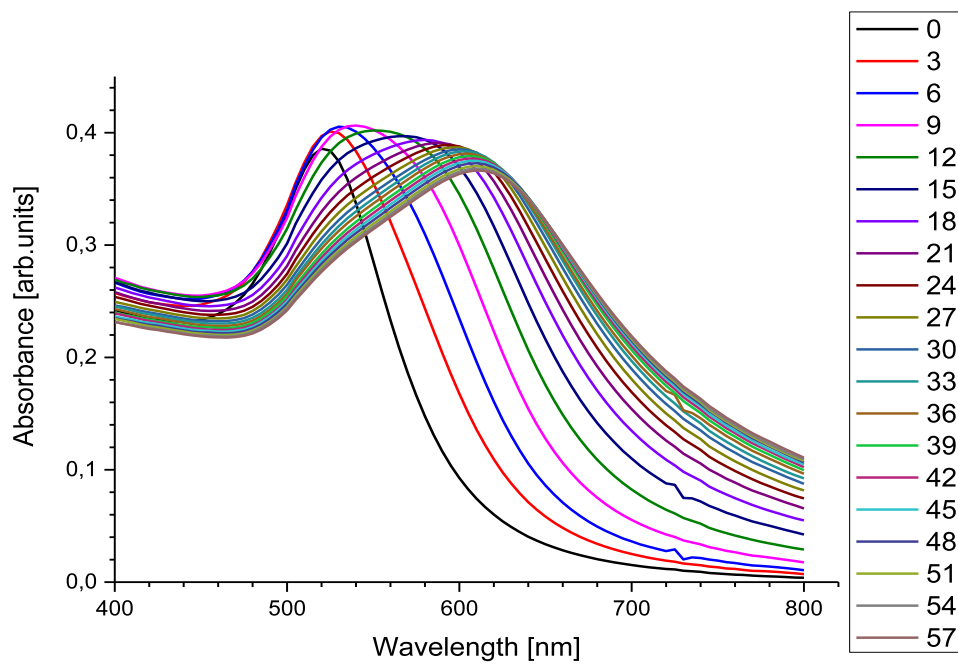

Figure S23: Time dependent absorption spectra of Au-MOA in HEPES/TRIS at pH 9 and 60 mMol KCl

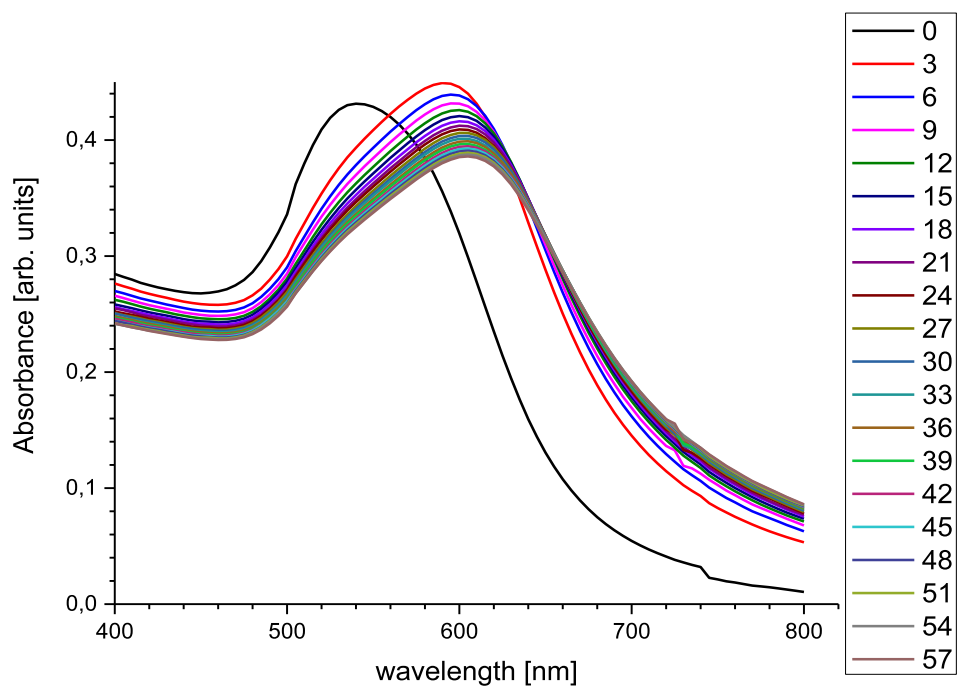

Figure S24: Time dependent absorption spectra of Au-MOA in HEPES/TRIS at pH 9 and 70 mMol KCl



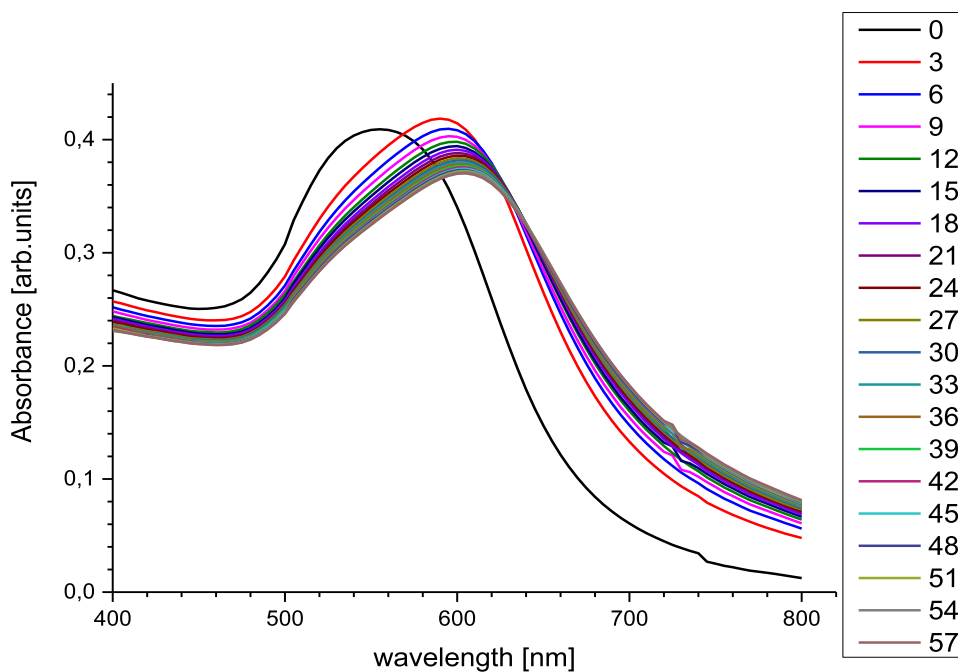

Figure S25: Time dependent absorption spectra of Au-MOA in HEPES/TRIS at pH 9 and 80 mMol KCl

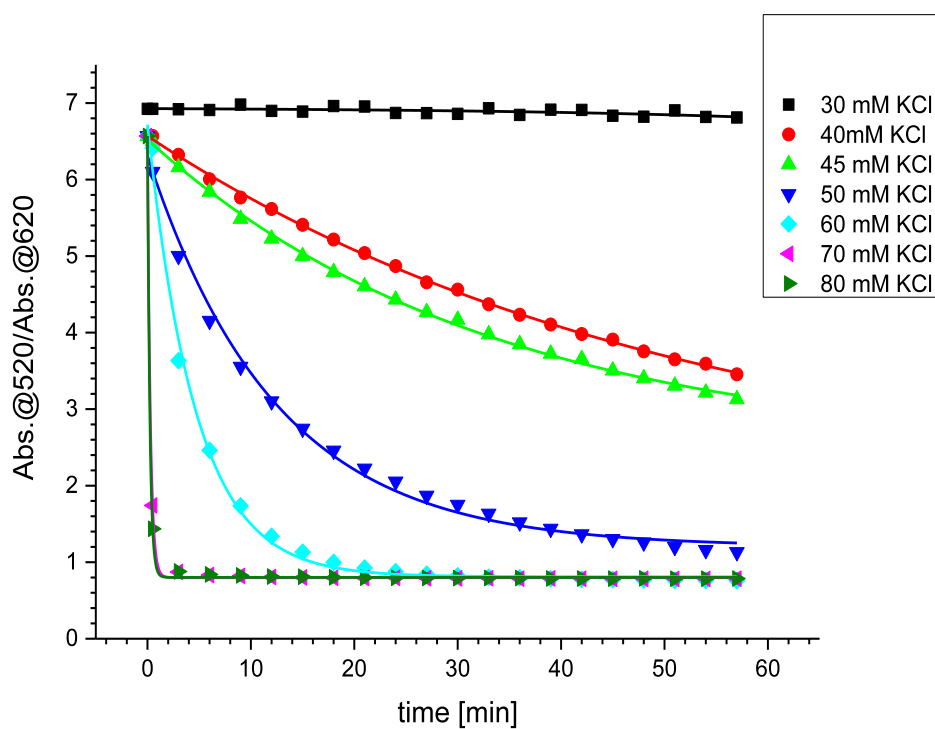

Figure S26: Progression of the ratio of absorbance  $R$  (symbols) for KCl concentrations from 30 mM to 80 mM and the respective fit curves (lines) fitted by a first order exponential decay function.

## 9. Salt Induced Aggregation of Au-MOA with CsCl

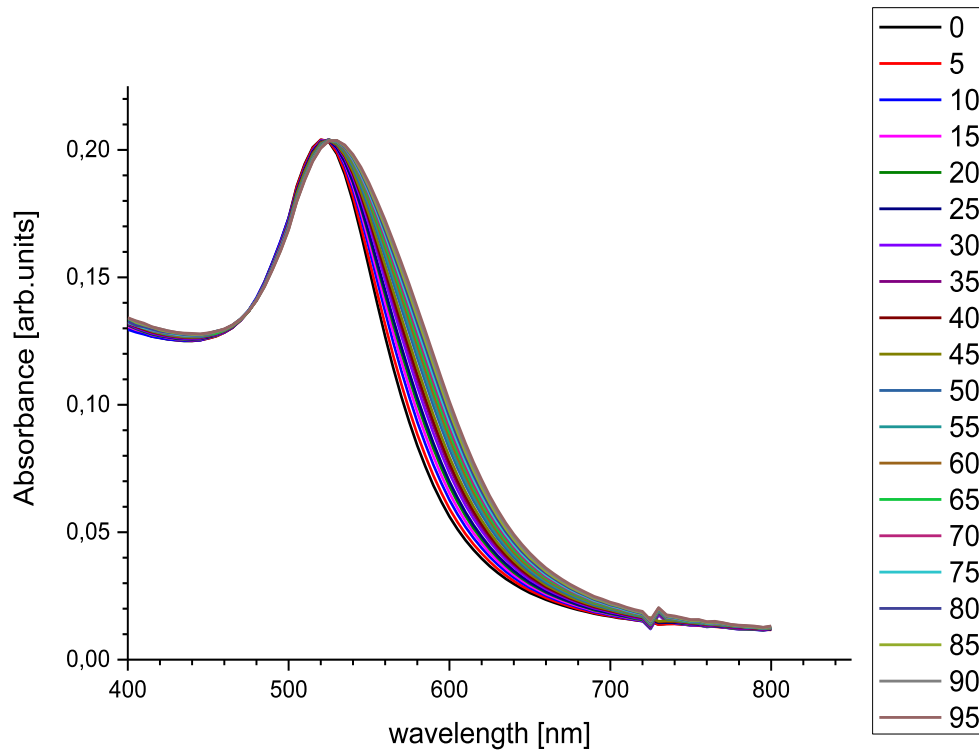

Figure S27: Time dependent absorption spectra of Au-MOA in HEPES/TRIS at pH 9 and 90 mMol CsCl

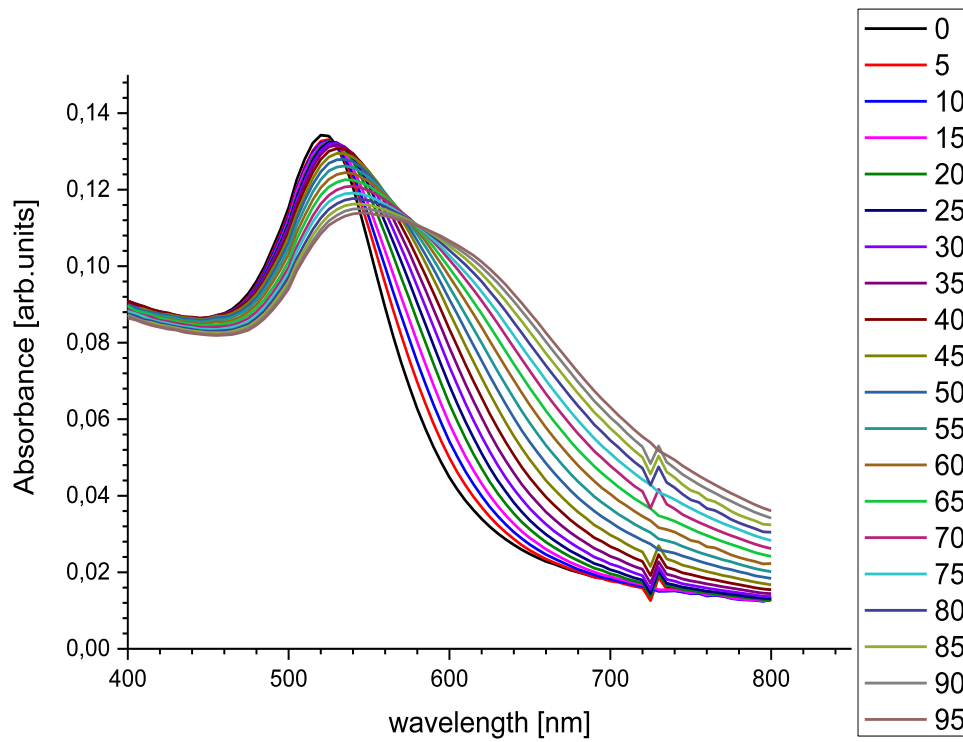

Figure S28: Time dependent absorption spectra of Au-MOA in HEPES/TRIS at pH 9 and 100 mMol CsCl

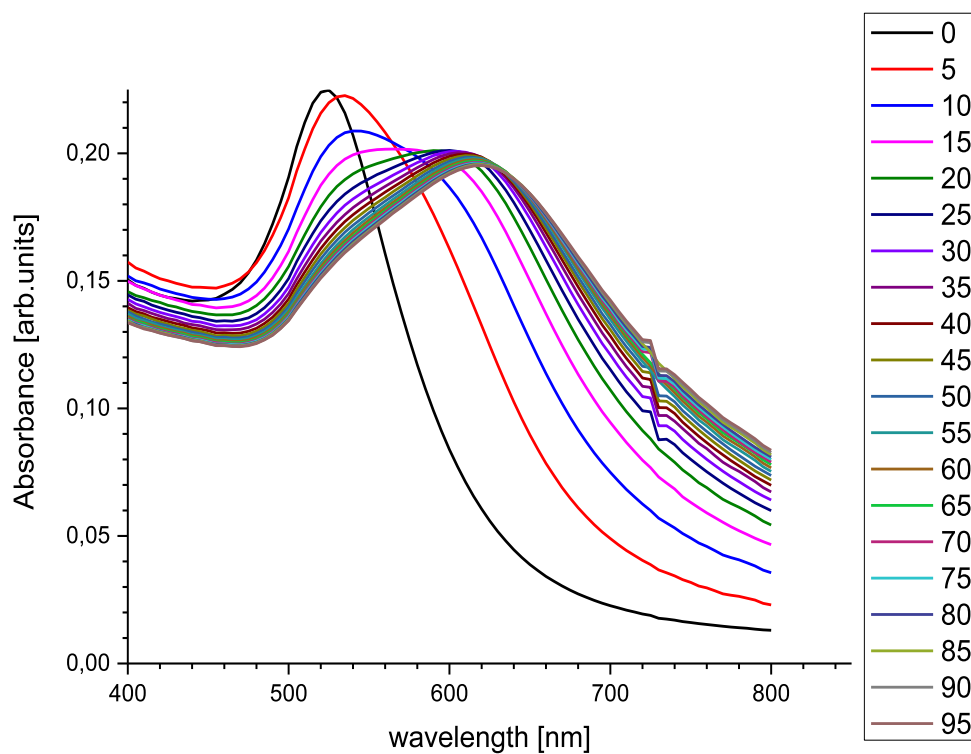

Figure S29: Time dependent absorption spectra of Au-MOA in HEPES/TRIS at pH 9 and 110 mMol CsCl

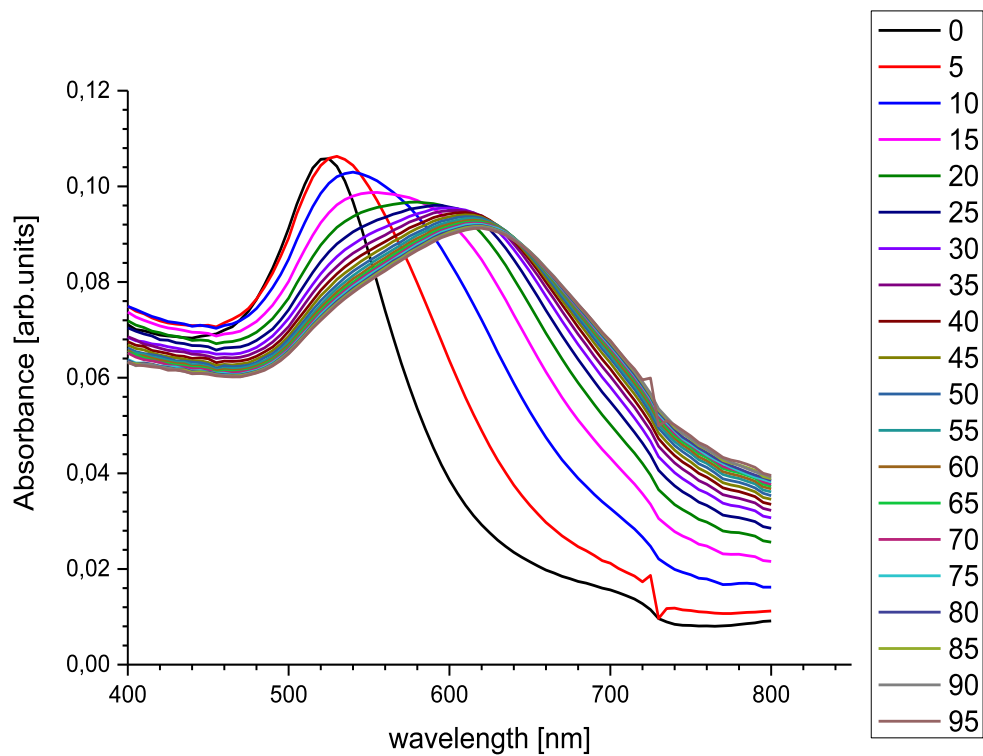

Figure S30: Time dependent absorption spectra of Au-MOA in HEPES/TRIS at pH 9 and 120 mMol CsCl

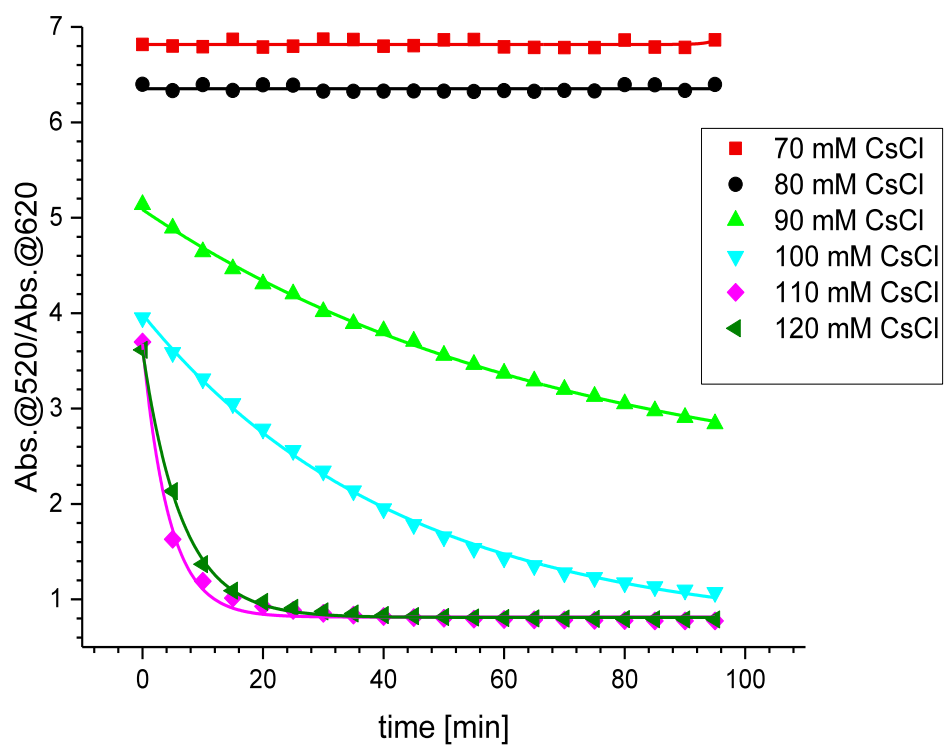

Figure S31: Progression of the ratio of absorbance  $R$  (symbols) for CsCl concentrations from 70 mM to 120 mM and the respective fit curves (lines) fitted by a first order exponential decay function.

### 10. Salt Induced Aggregation of Au-AOT with LiCl

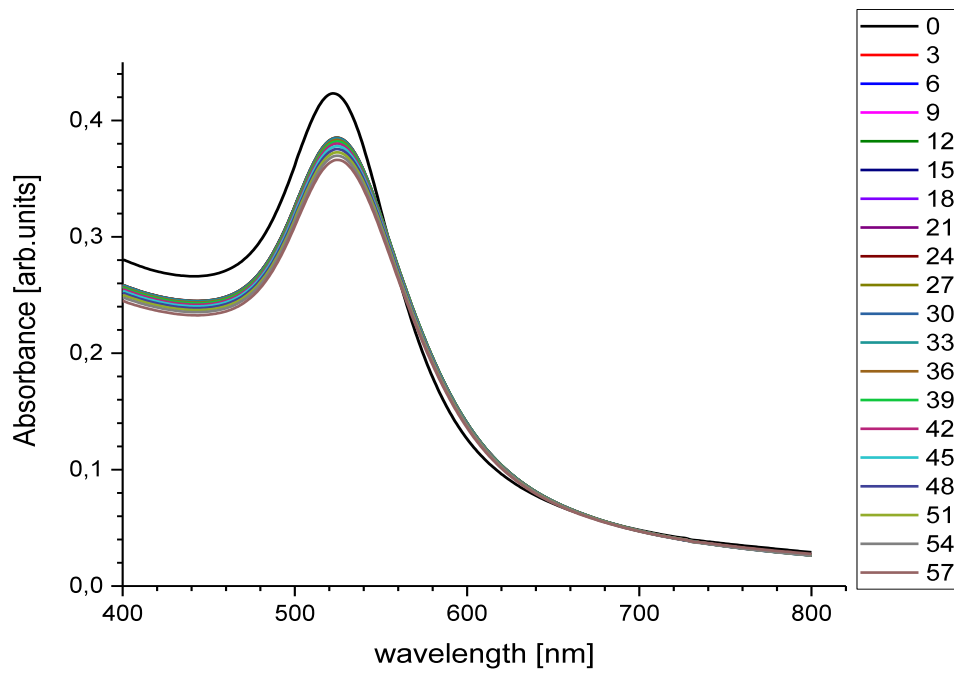

Figure S32: Time dependent absorption spectra of Au-AOT in diluted HCl at pH 3 and 100 mMol LiCl

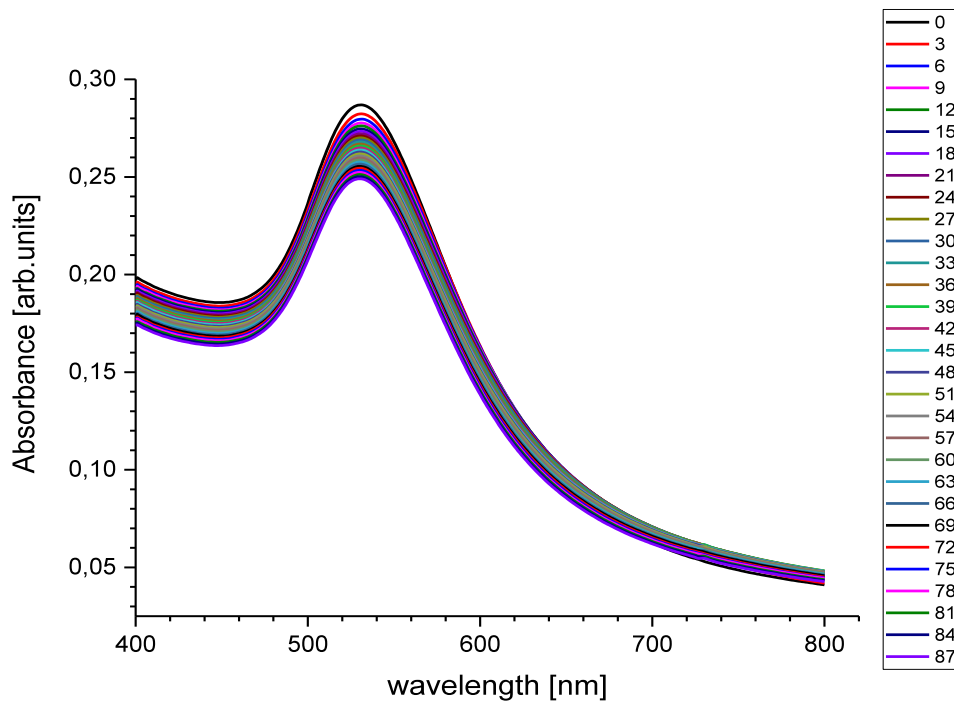

Figure S33: Time dependent absorption spectra of Au-AOT in diluted HCl at pH 3 and 125 mMol LiCl

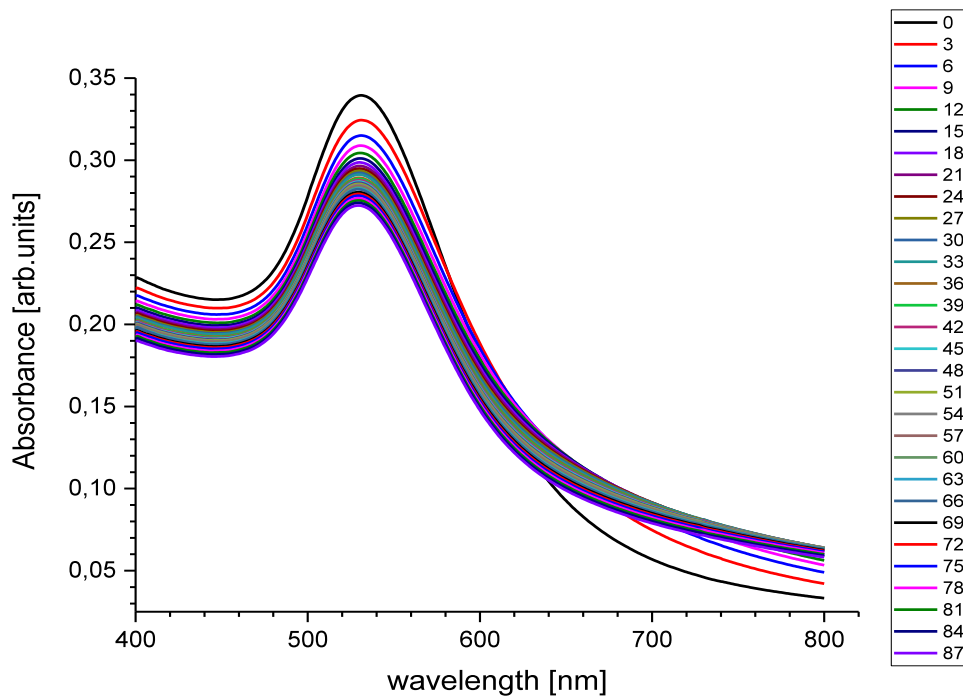

Figure S34: Time dependent absorption spectra of Au-AOT in diluted HCl at pH 3 and 150 mMol LiCl

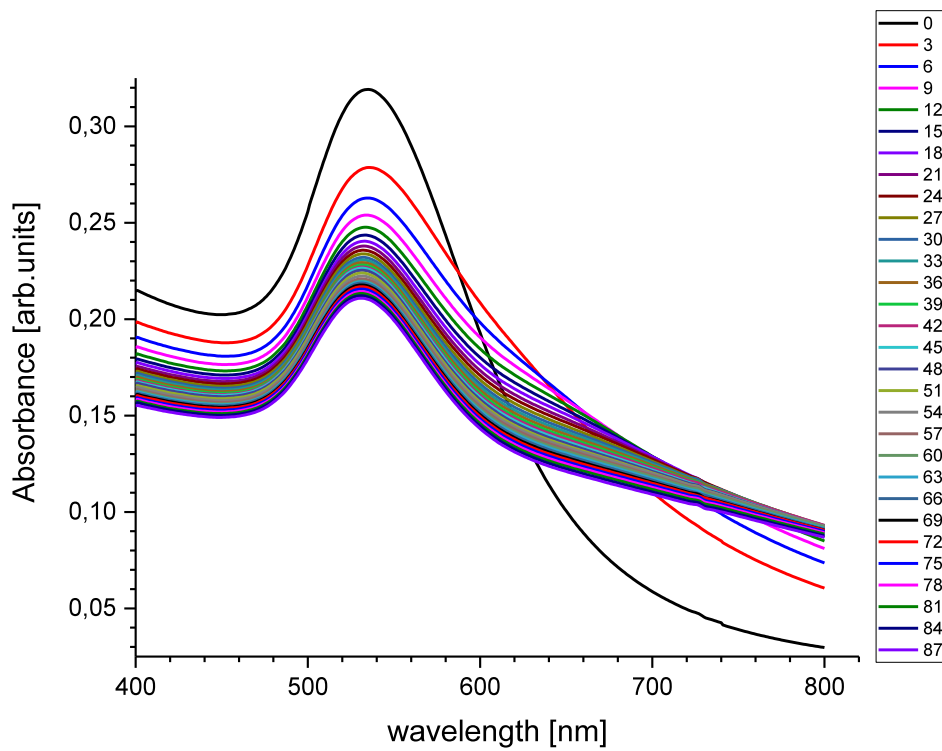

Figure S35: Time dependent absorption spectra of Au-AOT in diluted HCl at pH 3 and 175 mMol LiCl

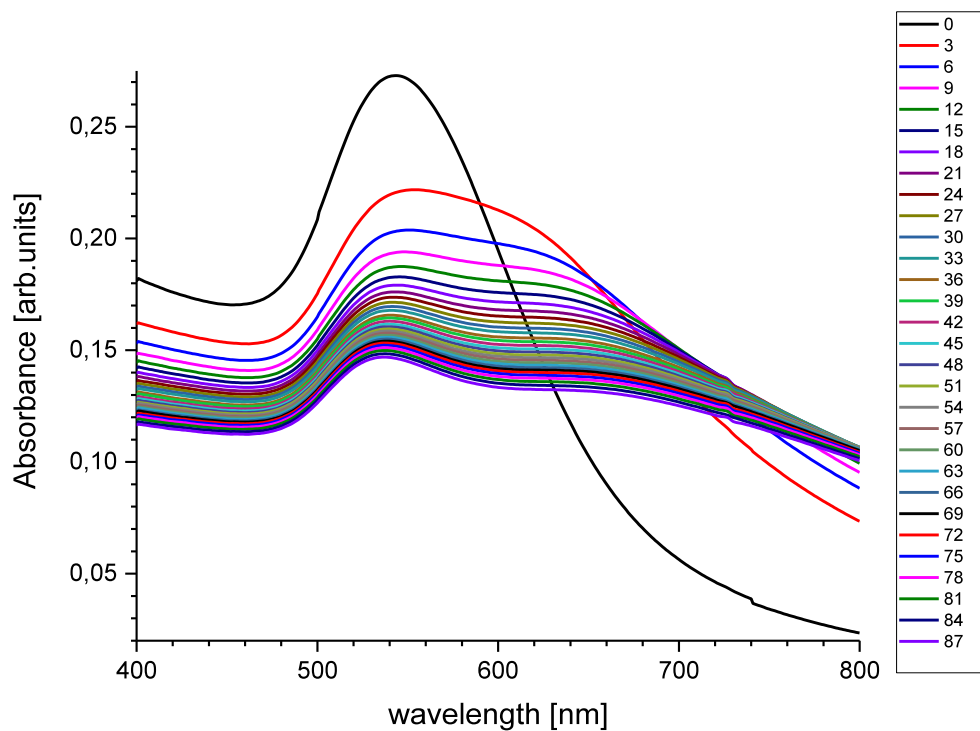

Figure S36: Time dependent absorption spectra of Au-AOT in diluted HCl at pH 3 and 200 mMol LiCl

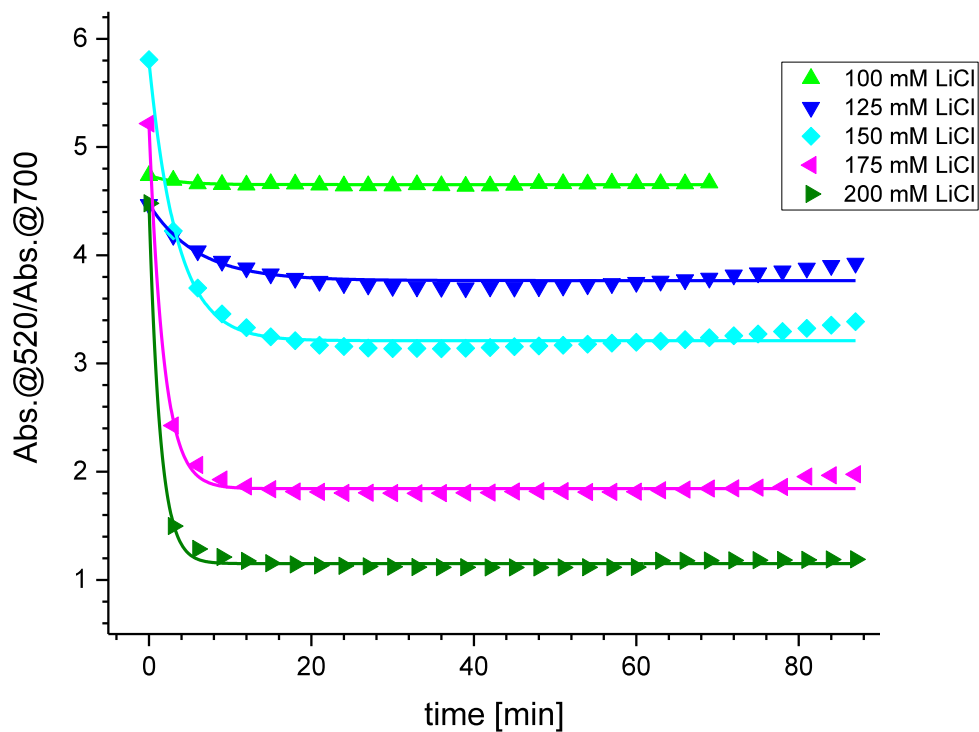

Figure S37: Progression of the ratio of absorbance  $R$  (symbols) for LiCl concentrations from 100 mM to 200 mM and the respective fit curves (lines) fitted by a first order exponential decay function.

### 11. Salt Induced Aggregation of Au-AOT with NaCl

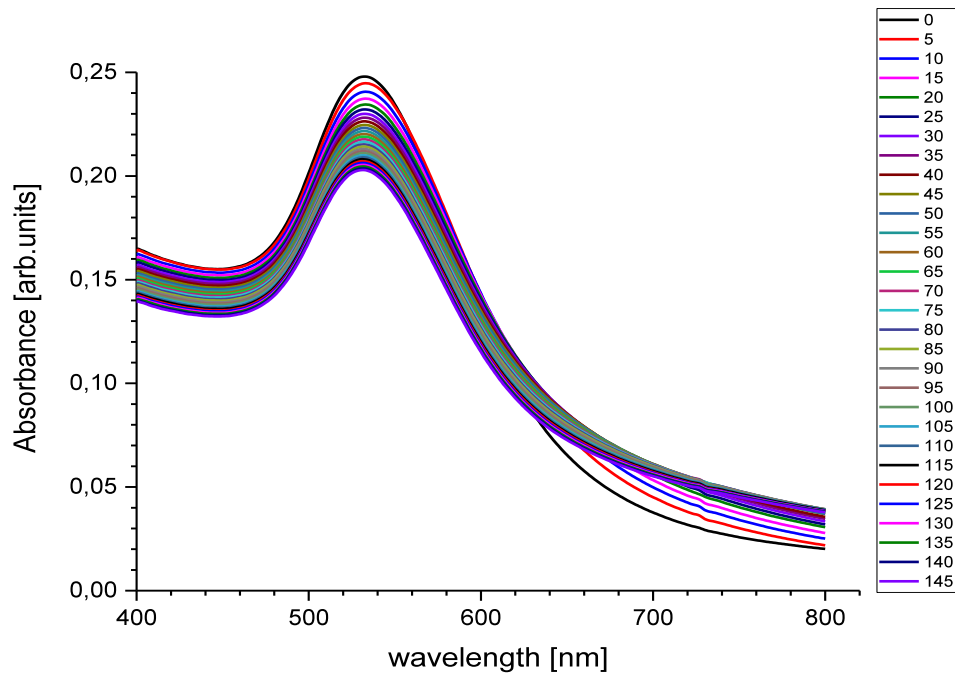

Figure S38: Time dependent absorption spectra of Au-AOT in diluted HCl at pH 3 and 100 mMol NaCl

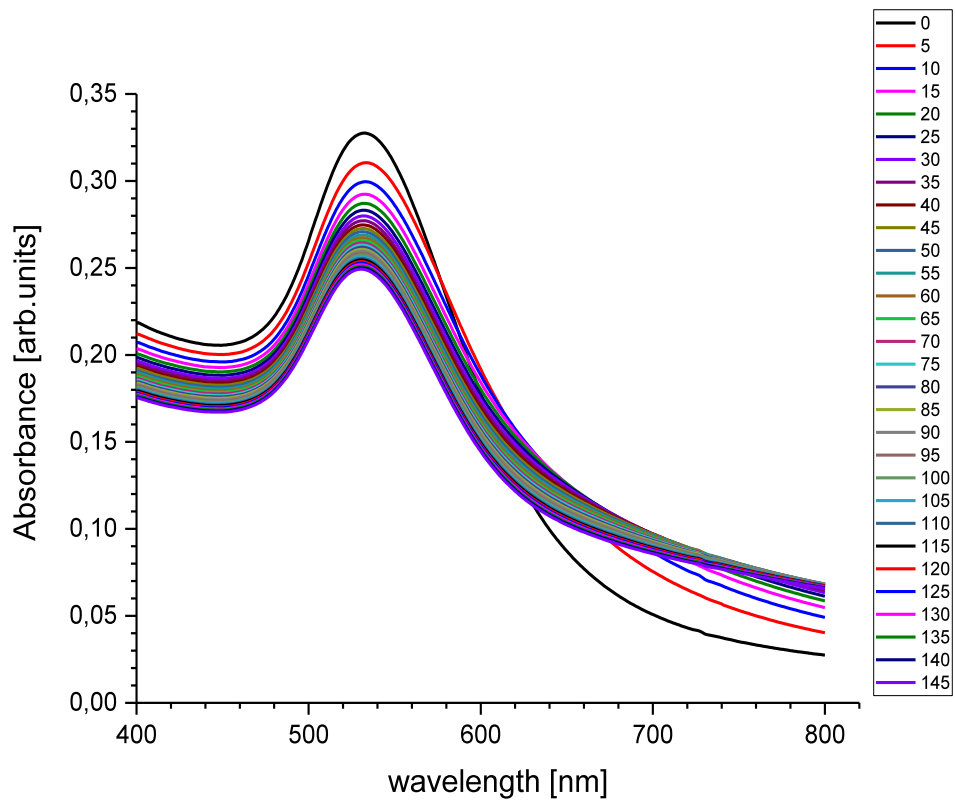

Figure S39: Time dependent absorption spectra of Au-AOT in diluted HCl at pH 3 and 125 mMol NaCl



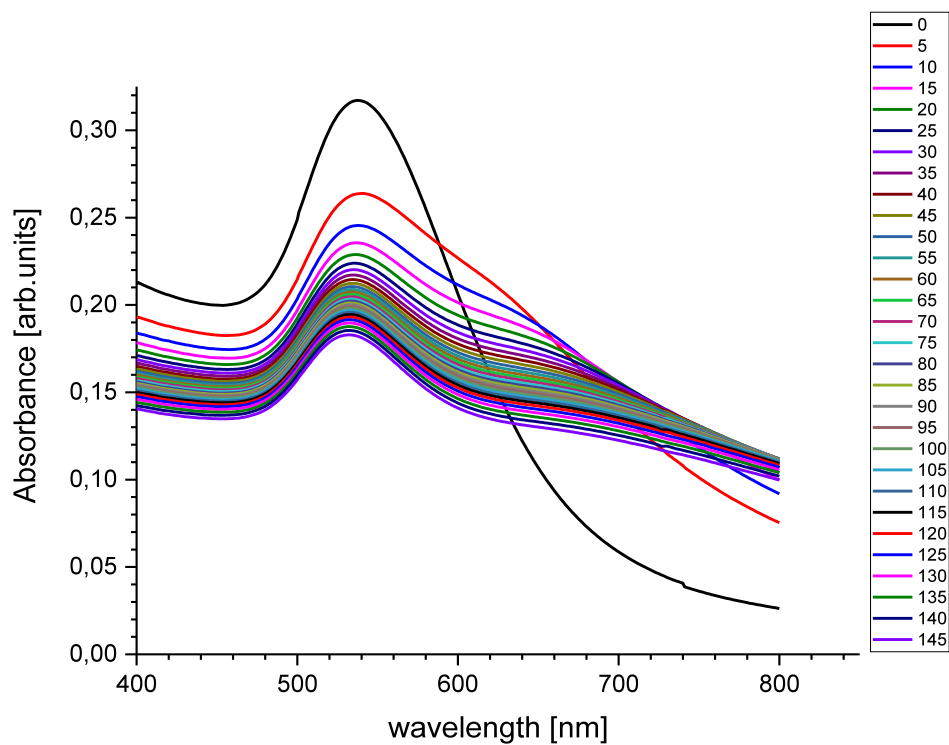

Figure S40: Time dependent absorption spectra of Au-AOT in diluted HCl at pH 3 and 150 mMol NaCl

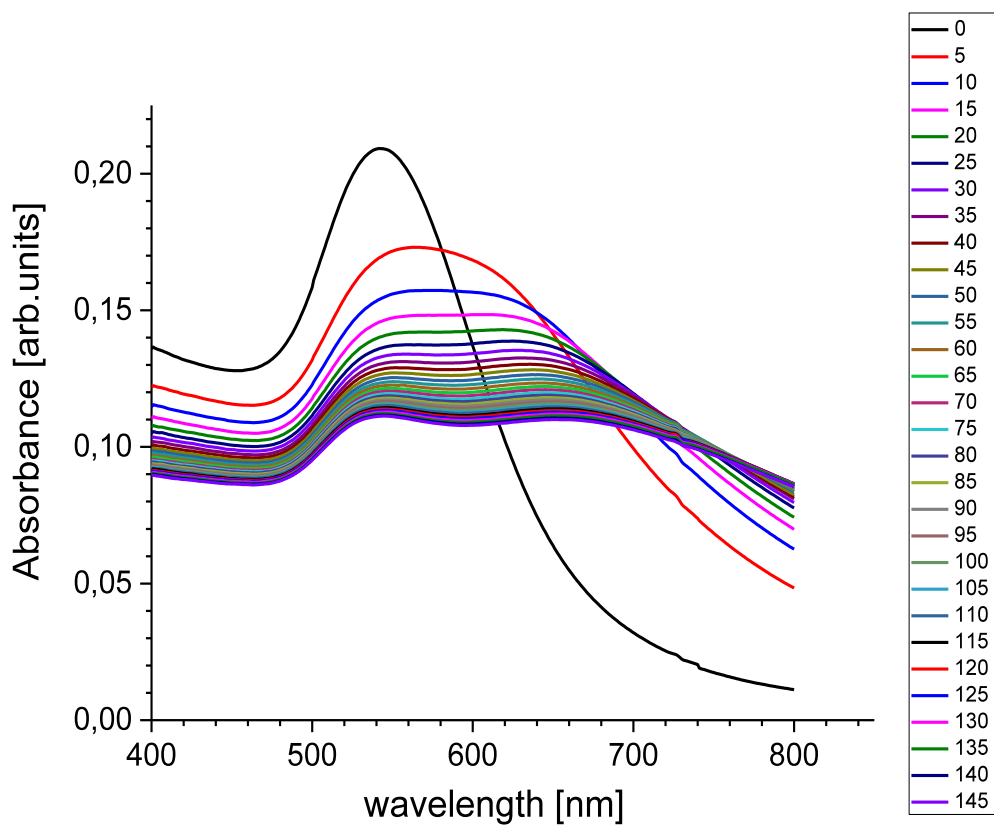

Figure S41: Time dependent absorption spectra of Au-AOT in diluted HCl at pH 3 and 175 mMol NaCl

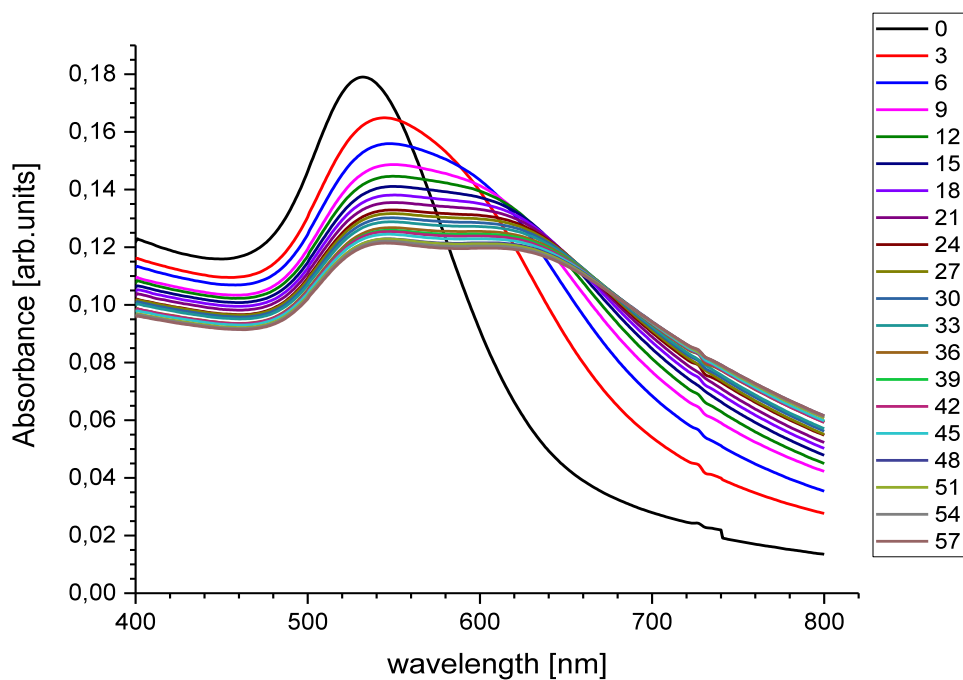

Figure S42: Time dependent absorption spectra of Au-AOT in diluted HCl at pH 3 and 200 mMol NaCl

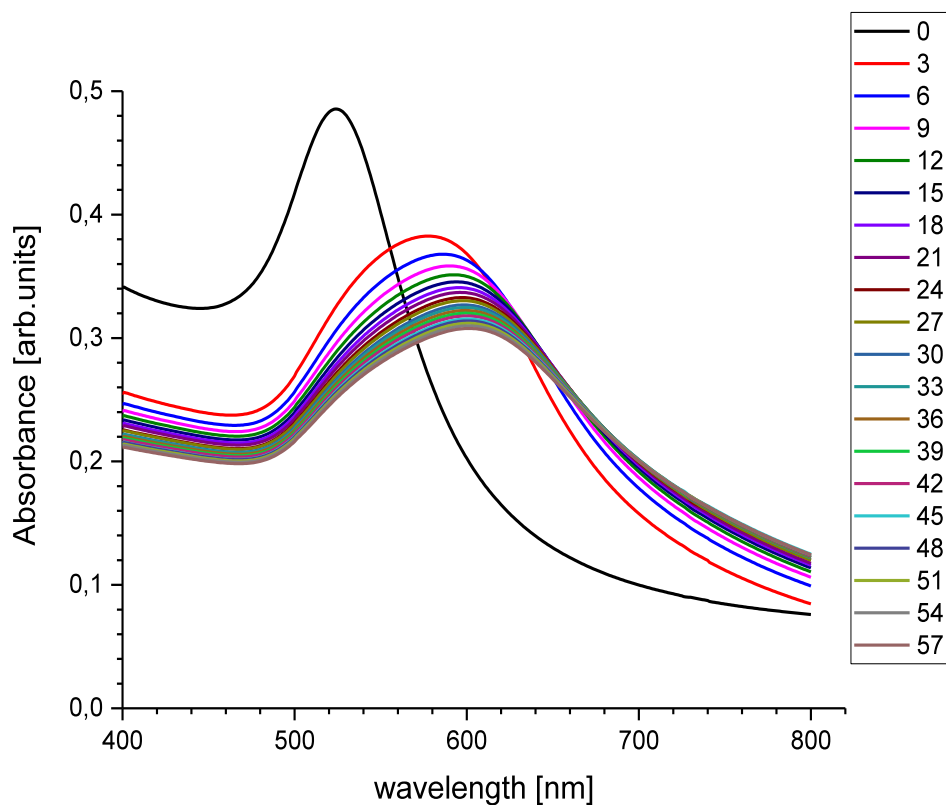

Figure S43: Time dependent absorption spectra of Au-AOT in diluted HCl at pH 3 and 225 mMol NaCl

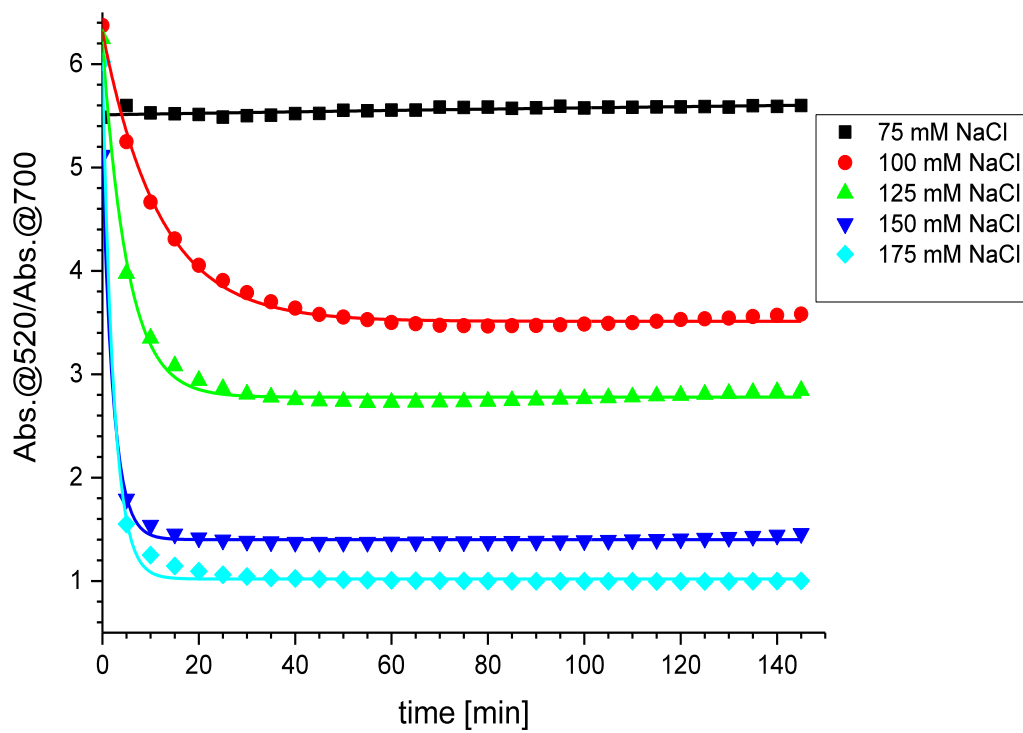

Figure S44: Progression of the ratio of absorbance  $R$  (symbols) for NaCl concentrations from 75 mM to 175 mM and the respective fit curves (lines) fitted by a first order exponential decay function.

## 12. Salt Induced Aggregation of Au-AOT with KCl

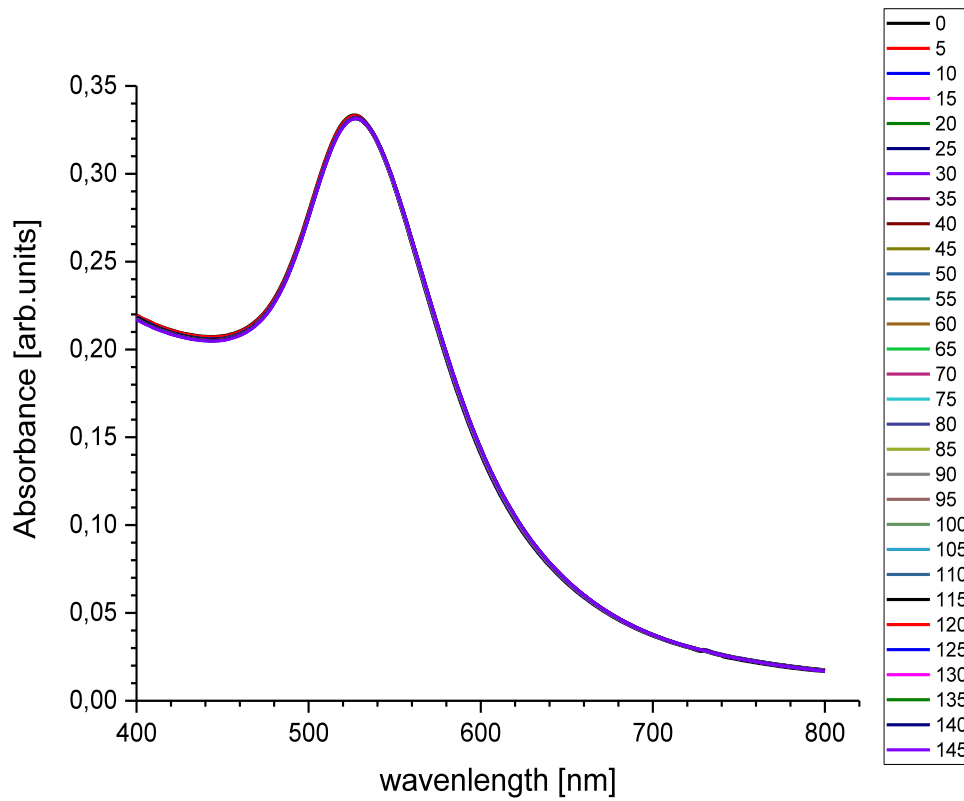

Figure S45: Time dependent absorption spectra of Au-AOT in diluted HCl at pH 3 and 100 mMol KCl

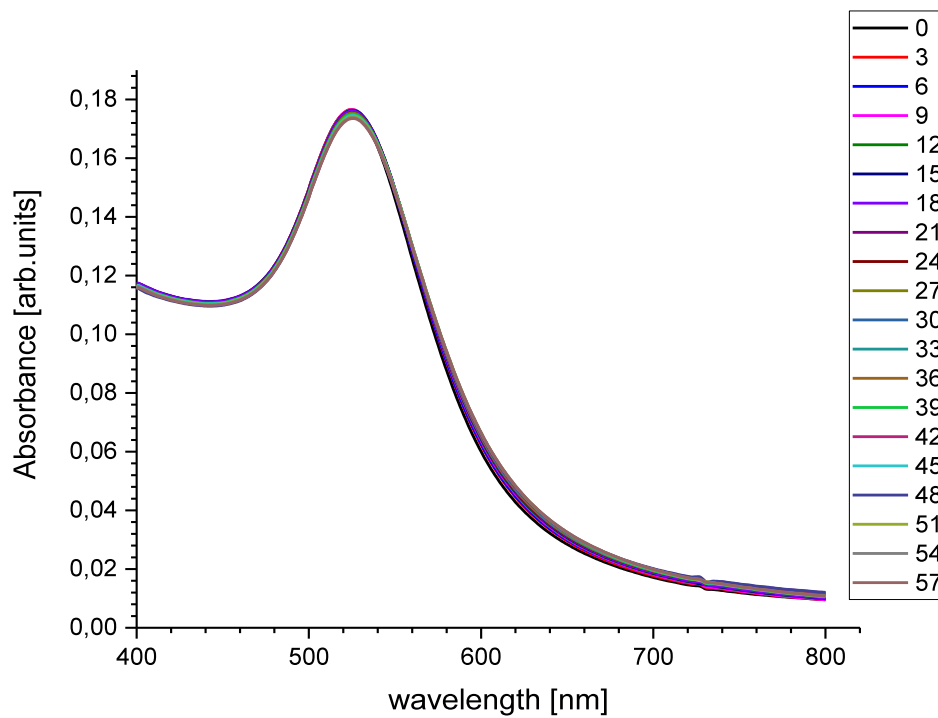

Figure S46: Time dependent absorption spectra of Au-AOT in diluted HCl at pH 3 and 125 mMol KCl

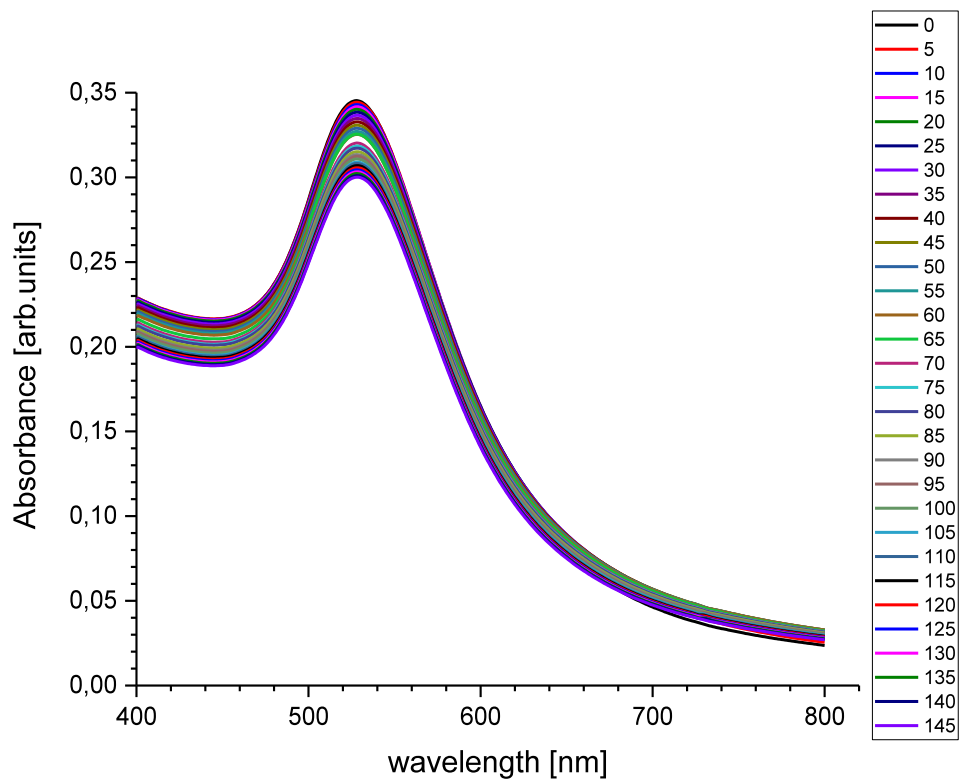

Figure S47: Time dependent absorption spectra of Au-AOT in diluted HCl at pH 3 and 150 mMol KCl

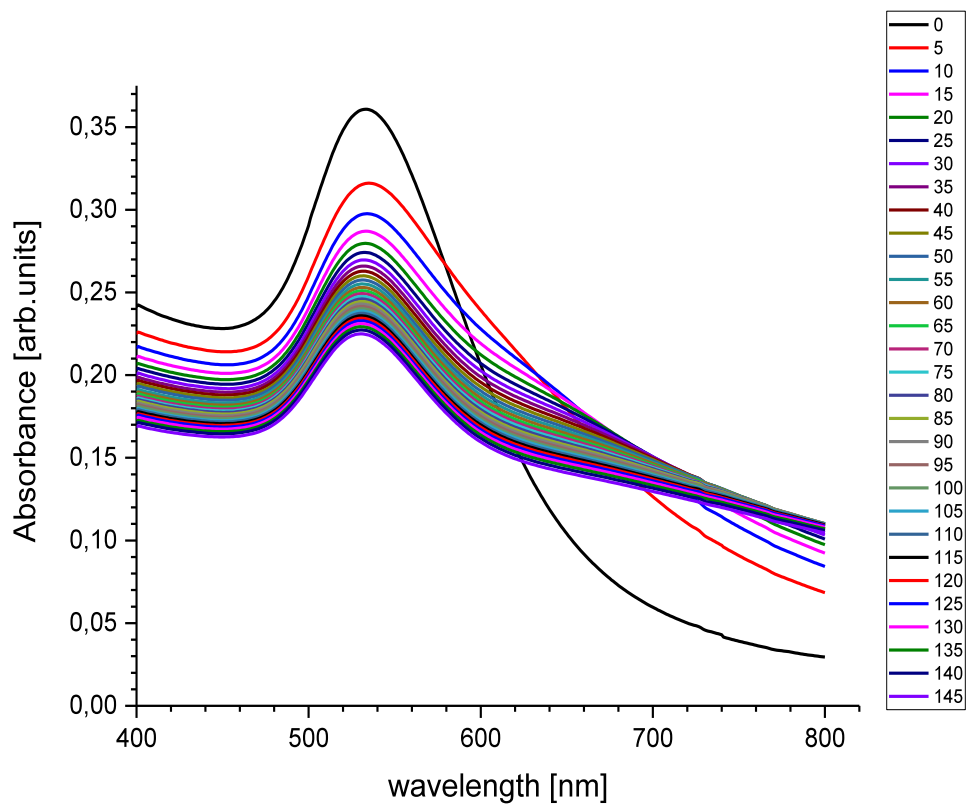

Figure S48: Time dependent absorption spectra of Au-AOT in diluted HCl at pH 3 and 175 mMol KCl

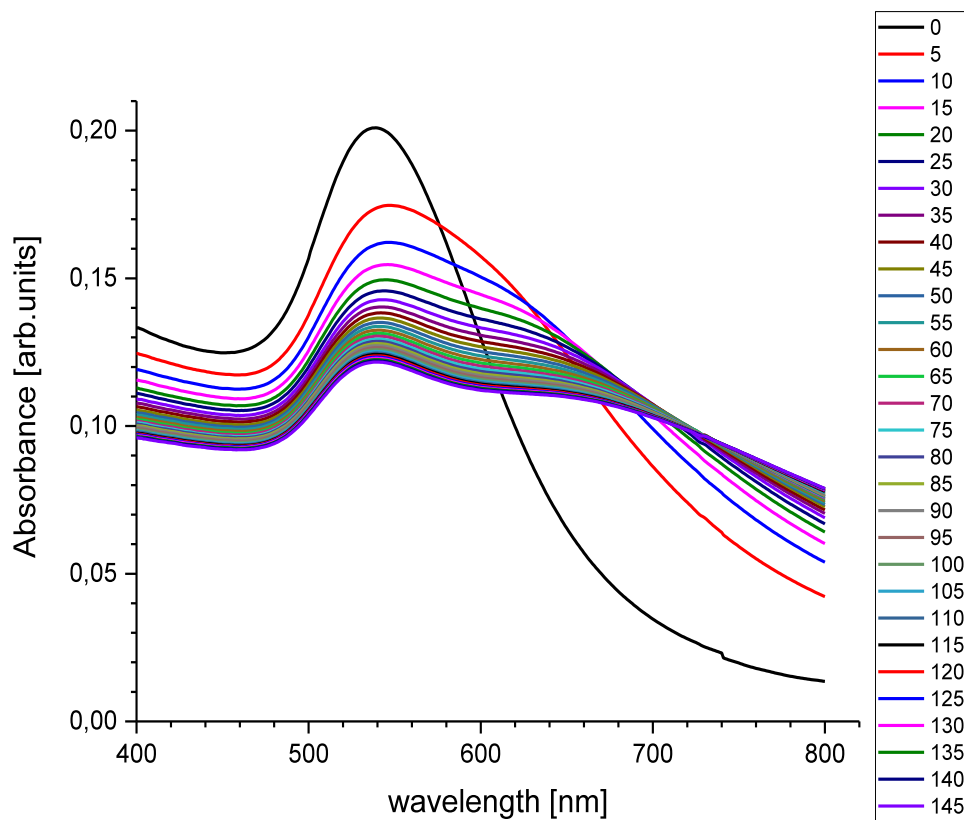

Figure S49: Time dependent absorption spectra of Au-AOT in diluted HCl at pH 3 and 200 mMol KCl

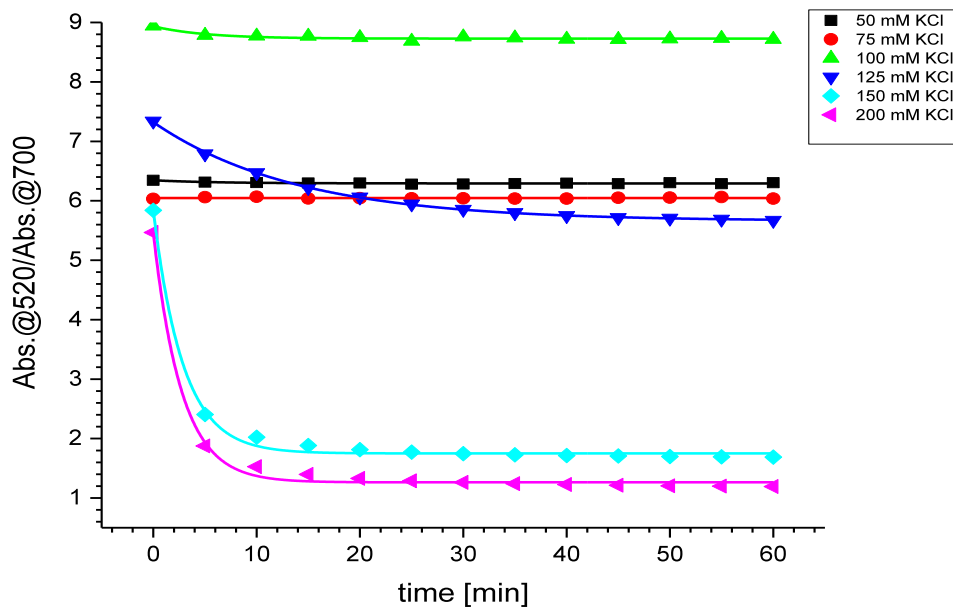

Figure S50: Progression of the ratio of absorbance  $R$  (symbols) for KCl concentrations from 50 mM to 200 mM and the respective fit curves (lines) fitted by a first order exponential decay function.

### 13. Salt Induced Aggregation of Au-AOT with CsCl

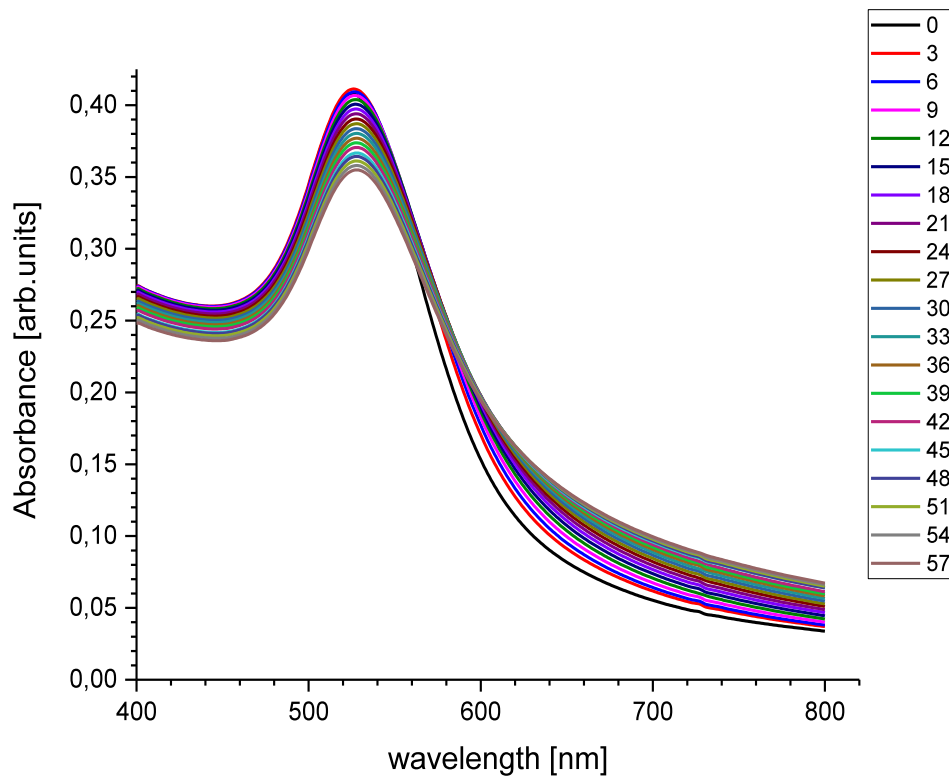

Figure S51: Time dependent absorption spectra of Au-AOT in diluted HCl at pH 3 and 200 mMol CsCl

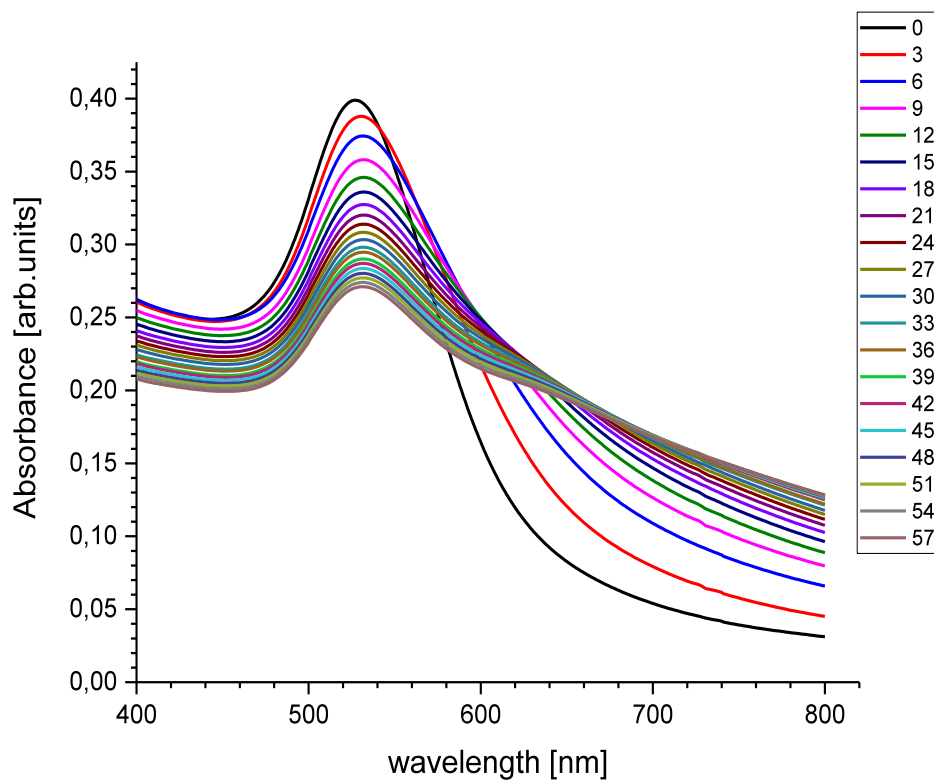

Figure S52: Time dependent absorption spectra of Au-AOT in diluted HCl at pH 3 and 225 mMol CsCl

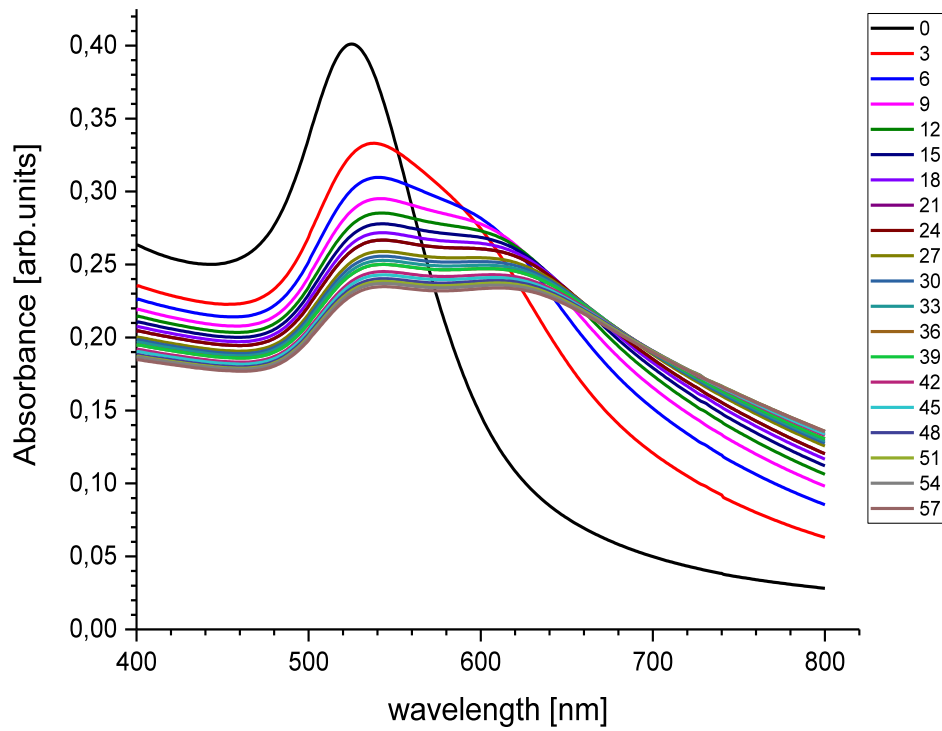

Figure S53: Time dependent absorption spectra of Au-AOT in diluted HCl at pH 3 and 250 mMol CsCl

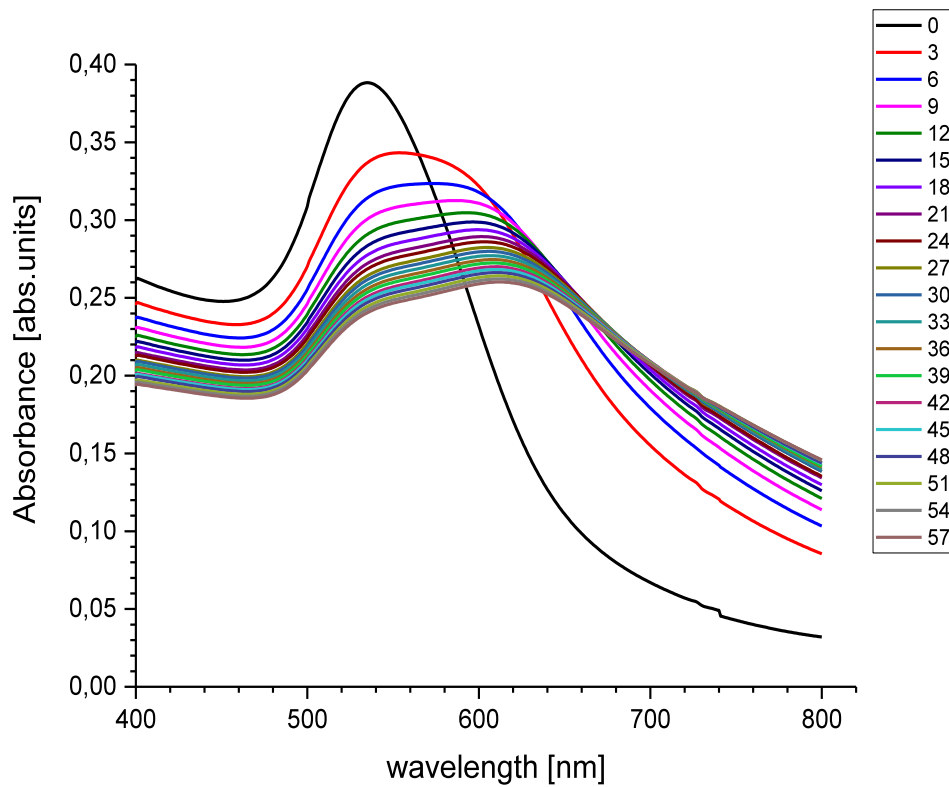

Figure S54: Time dependent absorption spectra of Au-AOT in diluted HCl at pH 3 and 275 mMol CsCl



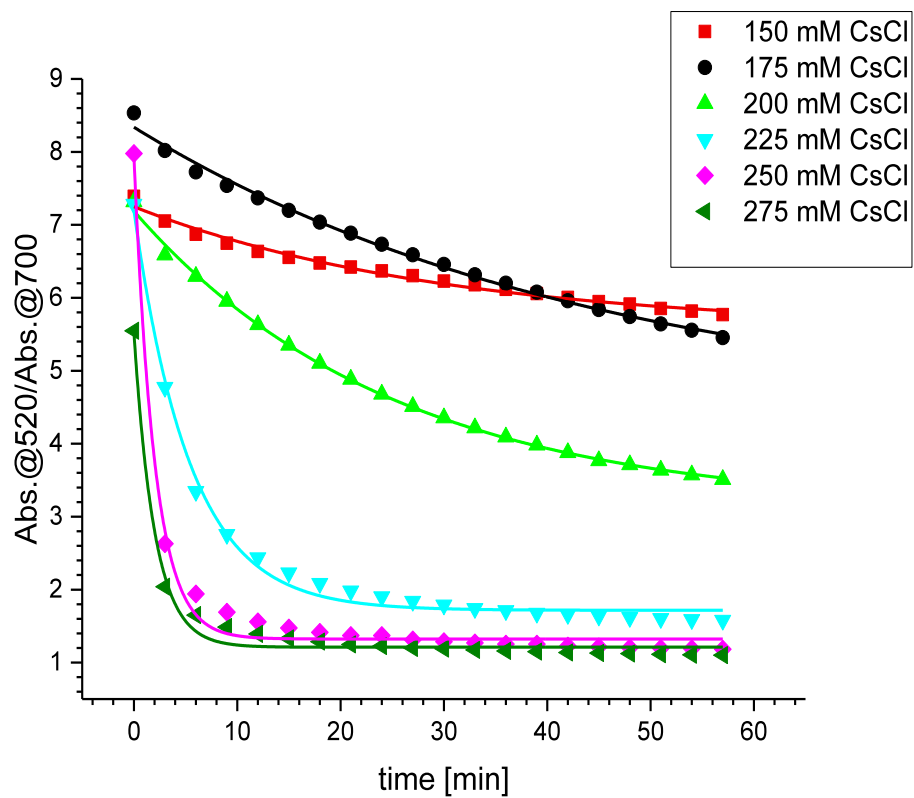

Figure S55: Progression of the ratio of absorbance  $R$  (symbols) for CsCl concentrations from 150 mM to 275 mM and the respective fit curves (lines) fitted by a first order exponential decay function.
